# Supplementary material for: Teaching indicators to unravel the kinetic features of host–guest inclusion complexes
Source: Royal Society of Chemistry journal article supplement (doi:10.1039/d0cc03715j), 2020-01-01
Supplement: d0cc03715j1.pdf [file d0cc03715j1.pdf]

## Electronic Supplementary Information

# Teaching indicators to unravel the kinetic features of host-guest inclusion complexes

Amrutha Prabodh,<sup>a</sup> Stephan Sinn,<sup>\*a</sup> Laura Grimm,<sup>a</sup> Zsombor Miskolczy,<sup>b</sup> Mónika Megyesi,<sup>b</sup> László Biczók,<sup>b</sup> Stefan Bräse,<sup>c</sup> and Frank Biedermann<sup>\*a</sup>

<sup>a</sup> Dr. S. Sinn, MSc. A. Prabodh, MSc. L. Grimm, Dr. F. Biedermann  
Institute of Nanotechnology (INT)  
Karlsruhe Institute of Technology (KIT),  
Hermann-von-Helmholtz Platz 1, 76344 Eggenstein-Leopoldshafen  
Germany  
E-Mail: stephan.sinn@kit.edu  
E-Mail: frank.biedermann@kit.edu

<sup>b</sup> Dr. Z. Miskolczy, Dr. M. Megyesi, Prof. L. Biczók  
Institute of Materials and Environmental Chemistry  
Research Centre for Natural Sciences  
Magyar tudósok körútja 2, 1117 Budapest, Hungary

<sup>c</sup> Prof. Dr. S. Bräse  
Institute of Organic Chemistry (IOC)  
Karlsruhe Institute of Technology (KIT)  
Fritz-Haber-Weg 6, 76131 Karlsruhe (Germany)  
Inst. f. Biologische und Chemische Systeme - Funktionelle molekulare Systeme (IBCS-FMS)  
Hermann-von-Helmholtz Platz 1, 76344 Eggenstein-Leopoldshafen  
&  
Karlsruhe Institute of Technology (KIT)  
Institute of Toxicology and Genetics (ITG)  
Hermann-von-Helmholtz-Platz 1  
76344 Eggenstein-Leopoldshafen, (Germany).

## 1 Table of Contents

|       |                                                                                            |    |
|-------|--------------------------------------------------------------------------------------------|----|
| 1     | Table of Contents.....                                                                     | 1  |
| 2     | General Information .....                                                                  | 3  |
| 2.1   | Abbreviations.....                                                                         | 3  |
| 2.2   | Solubility .....                                                                           | 4  |
| 2.3   | Photophysical properties .....                                                             | 4  |
| 2.4   | Experimental details .....                                                                 | 5  |
| 3     | Mathematical Equations for Kinetic Assay .....                                             | 6  |
| 3.1   | Direct–Binding Assay ( <i>kin</i> DBA) .....                                               | 6  |
| 3.2   | Guest–Displacement & Indicator-Displacement Assay ( <i>kin</i> GDA & <i>kin</i> IDA) ..... | 7  |
| 3.3   | GDA – Pseudo First Order ( <i>kin</i> GDA <sup>PFO</sup> ) .....                           | 8  |
| 4     | Determination of Kinetic Constants.....                                                    | 9  |
| 4.1   | Best Practice Guide for <i>kin</i> GDA and <i>kin</i> GDA <sup>PFO</sup> .....             | 9  |
| 4.2   | Binding Kinetics .....                                                                     | 11 |
| 4.2.1 | CB6⊃DSMI .....                                                                             | 12 |
| 4.2.2 | CB6⊃4-MBA .....                                                                            | 13 |
| 4.2.3 | CB7⊃BE.....                                                                                | 14 |
| 4.2.4 | CB7⊃MDAP .....                                                                             | 15 |

## Electronic Supplementary Information

---

|        |                                                                      |    |
|--------|----------------------------------------------------------------------|----|
| 4.2.5  | CB7 $\supset$ nandrolone .....                                       | 16 |
| 4.2.6  | CB7 $\supset$ cholesterol .....                                      | 19 |
| 4.2.7  | CB7 $\supset$ estradiol .....                                        | 19 |
| 4.2.8  | CB7(desalted) $\supset$ BE .....                                     | 20 |
| 4.2.9  | CB7(desalted) $\supset$ adamantanol .....                            | 21 |
| 4.2.10 | CB7 $\supset$ (+)-fenchone .....                                     | 22 |
| 4.2.11 | CB7 $\supset$ norcamphor .....                                       | 23 |
| 4.2.12 | CB8 $\supset$ MPCP .....                                             | 23 |
| 4.2.13 | CB8 $\supset$ nandrolone .....                                       | 24 |
| 4.2.14 | CB8 $\supset$ testosterone .....                                     | 24 |
| 4.2.15 | CB8 $\supset$ prednisolone .....                                     | 25 |
| 4.2.16 | CB8(desalted) $\supset$ MPCP .....                                   | 25 |
| 4.2.17 | CB8(desalted) $\supset$ adamantanol .....                            | 26 |
| 4.2.18 | CB8(desalted) $\supset$ ferrocenyl methanol .....                    | 27 |
| 4.2.19 | HSA $\supset$ warfarin .....                                         | 28 |
| 4.2.20 | HSA $\supset$ phenylbutazone .....                                   | 28 |
| 5      | Kinetic and Thermodynamic Correlation Analysis .....                 | 29 |
| 5.1    | Van't Hoff and Eyring Equations .....                                | 29 |
| 5.2    | Correlation Data .....                                               | 30 |
| 6      | Determination of Concentrations of Host-Guest Complexes by NMR ..... | 32 |
| 7      | References .....                                                     | 33 |

## 2 General Information

### 2.1 Abbreviations

|                               |                                                                                                                                                         |
|-------------------------------|---------------------------------------------------------------------------------------------------------------------------------------------------------|
| H                             | host                                                                                                                                                    |
| G                             | guest                                                                                                                                                   |
| D                             | (indicator) dye                                                                                                                                         |
| DBA                           | direct-binding assay                                                                                                                                    |
| <i>kin</i> DBA                | kinetic DBA                                                                                                                                             |
| IDA                           | indicator-displacement assay                                                                                                                            |
| <i>kin</i> IDA                | kinetic IDA                                                                                                                                             |
| GDA                           | guest-displacement assay                                                                                                                                |
| <i>kin</i> GDA                | kinetic GDA                                                                                                                                             |
| <i>kin</i> GDA <sup>PFO</sup> | pseudo-first order <i>kin</i> GDA                                                                                                                       |
| CB6                           | cucurbit[6]uril                                                                                                                                         |
| CB8                           | cucurbit[8]uril                                                                                                                                         |
| CB7                           | cucurbit[7]uril                                                                                                                                         |
| HSA                           | human serum albumin (fatty acid free)                                                                                                                   |
| DSMI                          | <i>trans</i> -4-[4-(Dimethylamino)styryl]-1-methylpyridinium iodide                                                                                     |
| BE                            | berberine                                                                                                                                               |
| MDAP                          | <i>N,N'</i> -dimethyl diazapyrene                                                                                                                       |
| MPCP                          | ( <i>rac</i> )- <i>N</i> -methyl-4-pyridinium[2.2]paracyclophane                                                                                        |
| MV                            | methyl viologen (doubly oxidized form, 2+)                                                                                                              |
| 4-MBA                         | 4-methylbenzylamine hydrochloride                                                                                                                       |
| AdOH                          | 1-adamantanol                                                                                                                                           |
| FeCp <sub>2</sub> OH          | ferrocenyl methanol                                                                                                                                     |
| PBZ                           | phenylbutazone                                                                                                                                          |
| PB                            | sodium phosphate buffer                                                                                                                                 |
| PBS                           | phosphate buffered saline (137 mM NaCl, 2.7 mM KCl, 10 mM Na <sub>2</sub> HPO <sub>4</sub> and 2 mM KH <sub>2</sub> PO <sub>4</sub> dissolved in water) |
| NMR                           | nuclear magnetic resonance                                                                                                                              |
| ITC                           | isothermal titration calorimetry                                                                                                                        |
| $\lambda$                     | wavelength                                                                                                                                              |
| $\epsilon$                    | molar extinction coefficient                                                                                                                            |
| <i>I</i>                      | observable signal (fluorescence intensity)                                                                                                              |

## 2.2 Solubility

**Table S1:** Solubility of selected guests in water

| compound                | solubility in water | reference |
|-------------------------|---------------------|-----------|
| 1-adamantanol           | soluble (> 2 mM)    | 1         |
| PBZ (aq. solution)      | 145 $\mu$ M         | 2         |
| nandrolone              | 810 $\mu$ M         | 3         |
| testosterone            | 114 $\mu$ M         | 3         |
| prednisolone            | 483 $\mu$ M         | 3         |
| estradiol               | 9 $\mu$ M           | 3         |
| progesterone            | 33 $\mu$ M          | 3         |
| warfarin (aq. solution) | 55.1 $\mu$ M        | 4         |
| berberine chloride      | 13.2 mM             | 5         |
| methyl viologen         | 2.50 M              | 6         |
| (+)-fenchone            | 14.1 mM             | 7         |
| norcamphor              | 264 mM              | 8         |

## 2.3 Photophysical properties

**Table S2:** Photophysical properties of used dyes and corresponding host:dye complexes

| dye                     | host | $\lambda_{\text{abs}}^{\text{max}} / \text{nm}^{[a]}$ | $\lambda_{\text{em}}^{\text{max}} / \text{nm}^{[b]}$ |
|-------------------------|------|-------------------------------------------------------|------------------------------------------------------|
| DSMI                    | –    | 450                                                   | 596                                                  |
|                         | CB6  | 450                                                   | 575                                                  |
| BE                      | –    | 432                                                   | 540 <sup>[c]</sup>                                   |
|                         | CB7  | 430                                                   | 500                                                  |
| MDAP                    | –    | 416                                                   | 425                                                  |
|                         | CB7  | 423                                                   | 431                                                  |
| MPCP                    | –    | 335                                                   | 535                                                  |
|                         | CB8  | 342                                                   | 542                                                  |
| warfarin <sup>[d]</sup> | –    | 308                                                   | 402                                                  |
|                         | HSA  | 308                                                   | 391                                                  |

If not stated differently all measurements were conducted in deionized water at 25°C. <sup>[a]</sup> maximum of the lowest-energy band. <sup>[b]</sup> maximum of the highest-energy band. <sup>[c]</sup> almost no emission signal detectable. <sup>[d]</sup> measured in PBS.

### 2.4 Experimental details

All solvents were used as received from Aldrich or Fluka without any further purification and all chemicals were used as received from the manufacturer, if not stated otherwise.  $^1\text{H}$  NMR spectra were recorded on a Bruker Avance 500 spectrometer. The  $^1\text{H}$  NMR chemical shifts ( $\delta$ ) are given in ppm and refer to residual protons on the corresponding deuterated solvent. All deuterated solvents were used as received without any further purification. All coupling constants ( $J$ ) are given in Hertz (Hz).

Absorption spectra were measured on a Jasco V-730 double-beam or on an Agilent Technologies Cary60 UV–Vis spectrophotometer and baseline corrected. Steady-state emission spectra and time resolved emission profiles were recorded on a Jasco FP-8300 fluorescence spectrometer equipped with a 450 W xenon arc lamp, double-grating excitation, emission monochromators or on a Jobin-Yvon Fluoromax-P spectrofluorometer. Emission spectra were corrected for source intensity (lamp and grating) and the emission spectral response (detector and grating) by standard correction curves. For spectral recording the automatic filter change of the FP-8300 was applied in order to exclude second order diffraction artefacts. All kinetic experiments were carried out at  $T=25^\circ\text{C}$  by using a water thermostated cell holder STR-812, while the cuvettes were equipped with a stirrer allowing rapid mixing. Stopped-flow experiments were carried out on a Jasco FP-8300 fluorescence spectrometer equipped with a thermostated ( $25^\circ\text{C}$ ) SFA-20 stopped-flow accessory from TgK Scientific Limited or on a Jobin-Yvon Fluoromax-P spectrofluorometer using a thermostated Applied Photophysics RX2000 rapid mixing accessory, which were driven by pneumatic drives. For UV-Vis absorption experiments UV plastic cuvettes with a light path of 10 mm and dimensions of 10x10 mm from Brand with a spectroscopic cut-off at 240 nm were utilized. For fluorescence-based kinetics experiments, PMMA cuvettes with a light path of 10 mm and dimensions of 10x10 mm from Brand with a spectroscopic cut-off at 300 nm were utilized.

The ITC experiments were carried out on a Microcal PEAQ-ITC from Malvern. All spectral experiments were conducted under air at room temperature, in Millipore  $\text{H}_2\text{O}$  or in  $\text{H}_2\text{O}$  freshly distilled three times from dilute  $\text{KMnO}_4$  solution. During titrations, all concentrations were kept constant except for that of the titrant. All data were baseline corrected by the average value of the titration curve of guest into water.

The differential equations describing the kinetic processes presented in the paper have been solved numerically with Wolfram Mathematica 11/12. An analytical solution might be also possible by Laplace transformations.<sup>9, 10</sup>

### 3 Mathematical Equations for Kinetic Assay

#### 3.1 Direct-Binding Assay (*kin*DBA)

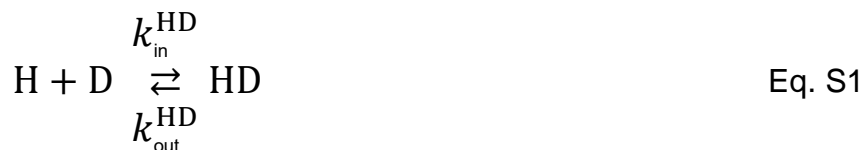

$$\frac{d[\text{HD}]_t}{dt} = k_{\text{in}}^{\text{HD}} \cdot [\text{H}]_t [\text{D}]_t - k_{\text{out}}^{\text{HD}} \cdot [\text{HD}]_t \quad \text{Eq. S2}$$

$$\frac{d[\text{D}]_t}{dt} = -k_{\text{in}}^{\text{HD}} \cdot [\text{H}]_t [\text{D}]_t + k_{\text{out}}^{\text{HD}} \cdot [\text{HD}]_t \quad \text{Eq. S3}$$

$$\frac{d[\text{H}]_t}{dt} = -k_{\text{in}}^{\text{HD}} \cdot [\text{H}]_t [\text{D}]_t + k_{\text{out}}^{\text{HD}} \cdot [\text{HD}]_t \quad \text{Eq. S4}$$

$$I_t = I^0 + I^{\text{HD}} \cdot [\text{HD}]_t + I^{\text{D}} \cdot [\text{D}]_t \quad \text{Eq. S5}$$

$[\text{H}]_t$  – host concentration at time  $t$ ,  $[\text{D}]_t$  – dye concentration at time  $t$ ,

$[\text{HD}]_t$  – host+dye concentration at time  $t$ ,

$k_{\text{in}}^{\text{HD}}$  – rate constant for the association of the host+dye (HD) complex (complexation),

$k_{\text{out}}^{\text{HD}}$  – rate constant for the dissociation of the host+dye (HD) complex (decomplexation),

$I^0$  – background signal,  $I^{\text{HD}}$  – constant proportional to the fluorescence efficiency of host+dye (HD) complex at the monitoring wavelength,  $I^{\text{D}}$  – constant proportional to the fluorescence efficiency of free dye (D) at the monitoring wavelength,

$t$  – observable signal as a function of time

3.2 Guest–Displacement & Indicator-Displacement Assay (*kin*GDA & *kin*IDA)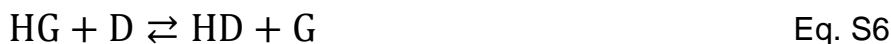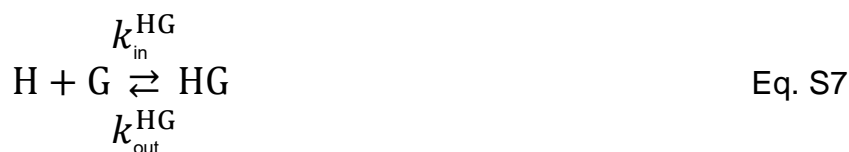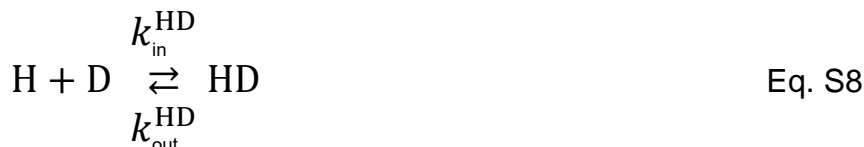

$$\frac{d[\text{HD}]_t}{dt} = k_{\text{in}}^{\text{HD}} \cdot [\text{H}]_t [\text{D}]_t - k_{\text{out}}^{\text{HD}} \cdot [\text{HD}]_t \quad \text{Eq. S9}$$

$$\frac{d[\text{D}]_t}{dt} = -k_{\text{in}}^{\text{HD}} \cdot [\text{H}]_t [\text{D}]_t + k_{\text{out}}^{\text{HD}} \cdot [\text{HD}]_t \quad \text{Eq. S10}$$

$$\frac{d[\text{HG}]_t}{dt} = k_{\text{in}}^{\text{HG}} \cdot [\text{H}]_t [\text{G}]_t - k_{\text{out}}^{\text{HG}} \cdot [\text{HG}]_t \quad \text{Eq. S11}$$

$$\frac{d[\text{G}]_t}{dt} = -k_{\text{in}}^{\text{HG}} \cdot [\text{H}]_t [\text{G}]_t + k_{\text{out}}^{\text{HG}} \cdot [\text{HG}]_t \quad \text{Eq. S12}$$

$$\frac{d[\text{H}]_t}{dt} = -k_{\text{in}}^{\text{HD}} \cdot [\text{H}]_t [\text{D}]_t + k_{\text{out}}^{\text{HD}} \cdot [\text{HD}]_t - k_{\text{in}}^{\text{HG}} \cdot [\text{H}]_t [\text{G}]_t + k_{\text{out}}^{\text{HG}} \cdot [\text{HG}]_t \quad \text{Eq. S13}$$

$$I_t = I^0 + I^{\text{HD}} \cdot [\text{HD}]_t + I^{\text{D}} \cdot [\text{D}]_t \quad \text{Eq. S14}$$

$[\text{H}]_t$  – host concentration at time  $t$ ,  $[\text{D}]_t$  – dye concentration at time  $t$ ,

$[\text{G}]_t$  – guest concentration at time  $t$ ,  $[\text{HD}]_t$  – host>dye concentration at time  $t$ ,

$[\text{HG}]_t$  – host>guest concentration at time  $t$ ,

$k_{\text{in}}^{\text{HD}}$  – rate constant for the association of the host>dye (HD) complex (complexation),

$k_{\text{out}}^{\text{HD}}$  – rate constant for the dissociation of the host>dye (HD) complex (decomplexation),

$k_{\text{in}}^{\text{HG}}$  – rate constant for the association of the host>guest (HG) complex (complexation),

$k_{\text{out}}^{\text{HG}}$  – rate constant for the dissociation of the host>guest(HG) complex (decomplexation),

$I^0$  – background signal,  $I^{\text{HD}}$  – constant proportional to the fluorescence efficiency of host>dye (HD) complex at the monitoring wavelength,  $I^{\text{D}}$  – constant proportional to the fluorescence efficiency of free dye (D) at the monitoring wavelength,

$I_t$  – observable signal as a function of time

3.3 GDA – Pseudo First Order (*kinGDA*<sup>PFO</sup>)

$$k_{in}^{HG} [G]_0 \ll k_{in}^{HD} [D]_0 \quad \text{Eq. S15}$$

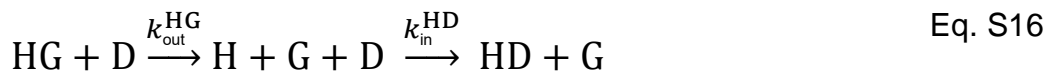

$$k_{out}^{HG} \ll k_{in}^{HD} [D]_0 \quad \text{Eq. S17}$$

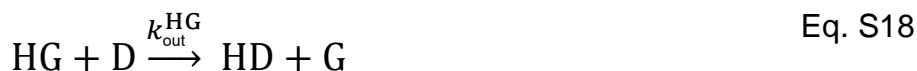

$$\frac{d[HD]_t}{dt} = -\frac{d[HG]_t}{dt} = k_{out}^{HG} \cdot [HG]_t \quad \text{Eq. S19}$$

$$\frac{d[HG]_t}{[HG]_t} = -k_{out}^{HG} \cdot dt \quad \int_{[HG]_0}^{[HG]_t} \frac{d[HG]_t}{[HG]_t} = \int_0^t -k_{out}^{HG} \cdot dt \quad \text{Eq. S20}$$

$$\ln[HG]_t = \ln[HG]_0 - k_{out}^{HG} \cdot t \quad [HG]_t = [HG]_0 e^{-k_{out}^{HG} \cdot t} \quad \text{Eq. S21}$$

$$I_t = I^{eq.} + A e^{-k_{out}^{HG} \cdot t} \quad \text{Eq. S22}$$

[D]<sub>t</sub> – dye concentration at time t, [D]<sub>0</sub> – dye concentration at time 0 (initial dye concentration),

[G]<sub>t</sub> – guest concentration at time t,

[G]<sub>0</sub> – guest concentration at time 0 (initial guest concentration),

[HD]<sub>t</sub> – host⊃dye concentration at time t,

[HG]<sub>t</sub> – host⊃guest concentration at time t,

[HG]<sub>0</sub> – host⊃guest concentration at time 0 (pre-equilibrated host⊃guest complex),

$k_{in}^{HD}$  – rate constant for the association of the host⊃dye (HD) complex (complexation),

$k_{out}^{HD}$  – rate constant for the dissociation of the host⊃dye (HD) complex (decomplexation),

$k_{in}^{HG}$  – rate constant for the association of the host⊃guest (HG) complex (complexation),

$k_{out}^{HG}$  – rate constant for the dissociation of the host⊃guest (HG) complex (decomplexation),

$I^{eq.}$  – signal offset (at equilibration of HD), A – amplitude,

t – observable signal as a function of time



## 4 Determination of Kinetic Constants

### 4.1 Best Practice Guide for *kinGDA* and *kinGDA*<sup>PFO</sup>

1. Gather information on solubility of host and guest in solvent of interest.
2. Estimate binding constant and kinetic rate constants of host-guest complex, e.g. by searching for related host-guest pairs on [www.suprabank.org](http://www.suprabank.org), [www.supramolecular.org](http://www.supramolecular.org) or in reviews.
3. Calculate which concentration of host and guest are needed to reach a sufficient degree of complexation of host (ideally  $\geq 50\%$ <sup>11</sup>). A software package is available from the authors upon request and provided on GitHub: <https://github.com/ASDSE/thermosimfit/zipball/master> for simulations. Excess of guest is permitted for *kinGDA* and *kinIDA*. If required guest concentration is within the solubility window, continue with step 5.
4. If required guest concentration is outside the solubility window, attempt to solubilize the guest in a solution of the host (sonication can help), followed by filtration/centrifugation and concentration determination of the host and guest concentration (e.g. by NMR, UV-Vis, HPLC etc., see section 6)
5. Simulate *kinGDA* by using Eq. S14 and adjust the indicator concentration and the host-guest concentration, while maintaining the degree of host-complexation sufficiently high. (A software package is available from the authors upon request and provided on GitHub: <https://github.com/ASDSE/kineticsimfit/zipball/master> for simulations.) Consider the solubility limit of the indicator. Ideally, dyes that show stronger emission or distinct absorbance spectra upon host binding are chosen.
6. Simulate the *kinDBA* (without guest) and *kinGDA* (with guest) for comparison. The *kinGDA* and *kinDBA* kinetic traces should look sufficiently distinct, if not, choose different concentrations or a different indicator dye.
7. Perform the *kinGDA* with the conditions derived from the simulations by rapidly mixing the pre-equilibrated H $\rightleftharpoons$ G solution with the dye solution at a controlled temperature. Practically, equilibration time should be  $\geq 100$  ms for conventional stopped-flow setups. If equilibration times are  $\geq 1$  min manual mixing may be used.
8. Fit the recorded *kinGDA* traces by using equations Eq. S14 utilizing the predetermined parameters:  $K_a^{\text{HD}}$ ,  $k_{\text{in}}^{\text{HD}}$ ,  $k_{\text{out}}^{\text{HD}}$  and the exact concentrations as an input. Utilizing  $k_{\text{in}}^{\text{HG}} = k_{\text{out}}^{\text{HG}} \cdot K_a^{\text{HG}}$  as an input will increase the goodness of the fit. (A software package is available from the authors upon request and provided on GitHub: <https://github.com/ASDSE/kineticsimfit/zipball/master> for fitting.) The signal factors  $I^{\text{HD}}$  and  $I^{\text{D}}$  may be varied but their ratio should

stay close to the expected value from the host-dye titration experiment. From the fitting, the host-guest kinetic rate constants  $k_{in}^{HG}$ ,  $k_{out}^{HG}$  can be extracted. Analogously, this procedure can be applied for the akin method of *kinIDA*.

9. For *kinGDA*<sup>PFO</sup> perform steps 1 – 7, but with a large excess of dye. Fit the acquired kinetic traces to Eq. S22 to obtain  $k_{out}^{HG}$ . Subsequently,  $k_{in}^{HG}$  can be derived by using the relation
- $$k_{in}^{HG} = k_{out}^{HG} \cdot K_a^{HG}.$$

#### 4.2 Error estimation

In order to provide a decent error estimation, up to seven repetition experiments were conducted at the exact same conditions. The estimated true value of the kinetic rate constant was then calculated by the arithmetic mean and compared to the median of the sample set. The resulting standard deviation was subsequently used to calculate the error based on a 95% confidence interval (CI) applying a t-distribution. In some cases, the number of repetitions was decreased for practical reasons (very long equilibration time). The t-distribution accounts for a reduced sampling size by the incorporated degrees-of-freedom.<sup>11</sup>

The error estimation is demonstrated for the *kinGDA* experiment of the guest nandrolone (=19-nortestosterone) (1.02  $\mu$ M) with the host CB8 (1.01  $\mu$ M) and MPCP (50  $\mu$ M) as indicator in water. The affinity value  $K_a = 1.12 \cdot 10^7 \text{ M}^{-1}$  was determined in a separate thermodynamic experiment under the same conditions. The results obtained for  $k_{in}$  (in  $\text{s}^{-1}\text{M}^{-1}$ ) are:

|            |                   |                   |                              |                   |                   |                   |                   |
|------------|-------------------|-------------------|------------------------------|-------------------|-------------------|-------------------|-------------------|
|            | $9.80 \cdot 10^6$ | $1.08 \cdot 10^7$ | $1.13 \cdot 10^7$            | $1.13 \cdot 10^7$ | $1.13 \cdot 10^7$ | $1.13 \cdot 10^7$ | $1.14 \cdot 10^7$ |
| Mean =     | $1.1 \cdot 10^7$  |                   | $\text{s}^{-1}\text{M}^{-1}$ |                   |                   |                   |                   |
| StDev =    | $5.74 \cdot 10^5$ |                   | $\text{s}^{-1}\text{M}^{-1}$ |                   |                   |                   |                   |
| $\alpha$ = | 5%                |                   |                              |                   |                   |                   |                   |
| CI =       | 95%               |                   |                              |                   |                   |                   |                   |
| DF =       | 6                 |                   |                              |                   |                   |                   |                   |
| Error =    | $5.31 \cdot 10^5$ |                   | $\text{s}^{-1}\text{M}^{-1}$ |                   |                   |                   |                   |
| Error ~    | 5%                |                   |                              |                   |                   |                   |                   |

Although the error typically is equal or lower than 10% for the competitive binding assays shown, the estimated errors of the direct binding assays for indicator and host have to be taken into account as well. Here we typically obtained a greater error between 10 – 30%. As the pseudo-first order *kinGDA*<sup>PFO</sup> method is independent of the kinetic rate constants of the used (as long as complying to the prerequisites), this method is very precise. For the competitive methods *kinGDA* and *kinIDA* an error propagation (even on the basis of an analytical solution) is not trivial. We recommend to apply a larger error estimate of  $\leq 30\%$  as a safe interval for the determined kinetic rate constants, which also covers lab-to-lab differences due to use of CBn specimens with different amounts and types of salts.

## 4.3 Binding Kinetics

Table S3: Kinetic constants for the analyzed guests with different hosts

| guest                                      | host                              | dye                              | $k_{in}^{[a]} / s^{-1} M^{-1}$ | $k_{out}^{[a]} / s^{-1}$        | method                       | $\log(K_a/M^{-1})$   |
|--------------------------------------------|-----------------------------------|----------------------------------|--------------------------------|---------------------------------|------------------------------|----------------------|
| DSMI (0.27 $\mu$ M)                        | CB6 (0.28 $\mu$ M)                | –                                | $1.95 (\pm 0.8) \cdot 10^8$    | $24.42 (\pm 0.4)$               | <i>kinDBA</i>                | 6.90                 |
| 4-MBA <sup>[b]</sup> (8.23 $\mu$ M)        | CB6 (1.05 $\mu$ M)                | DSMI (2.08 $\mu$ M)              | $3.33 (\pm 0.03) \cdot 10^4$   | $6.49 (\pm 0.05) \cdot 10^{-4}$ | <i>kinIDA</i>                | 7.71                 |
| BE (0.23 $\mu$ M) <sup>[c]</sup>           | CB7 (0.23 $\mu$ M)                | –                                | $1.9 (\pm 0.1) 10^7$           | $0.81 (\pm 0.08)$               | <i>kinDBA</i>                | 7.38                 |
| BE (0.2 $\mu$ M)                           | CB7 (0.3 $\mu$ M)                 | –                                | $6.0 (\pm 1.5) \cdot 10^6$     | $0.4 (\pm 0.1)$                 | <i>kinDBA</i>                | 7.23 <sup>[h]</sup>  |
| BE (1.2 $\mu$ M)                           | CB7 <sup>[d]</sup> (1 $\mu$ M)    | –                                | $2.47 (\pm 0.3) \cdot 10^6$    | $0.23 (\pm 0.03)$               | <i>kinDBA</i>                | 7.03                 |
| MDAP (71 nM)                               | CB7 (72 nM)                       | –                                | $2.4 (\pm 0.5) \cdot 10^7$     | $9.0 (\pm 1.8) \cdot 10^{-3}$   | <i>kinDBA</i>                | 9.43 <sup>[h]</sup>  |
|                                            |                                   | BE <sup>[e]</sup> (50 $\mu$ M)   | $3.0 (\pm 0.2) \cdot 10^3$     | $3.7 (\pm 0.1) \cdot 10^{-2}$   | <i>kinGDA</i> <sup>PFO</sup> | 5.18 <sup>[i]</sup>  |
|                                            |                                   | MDAP <sup>[e]</sup> (25 $\mu$ M) | $2.5 (\pm 0.1) \cdot 10^3$     | $3.1 (\pm 0.1) \cdot 10^{-2}$   | <i>kinGDA</i> <sup>PFO</sup> | 5.18 <sup>[i]</sup>  |
|                                            |                                   | BE (2 $\mu$ M)                   | $4.1 (\pm 0.4) \cdot 10^3$     | $3.6 (\pm 0.2) \cdot 10^{-4}$   | <i>kinGDA</i>                | 7.05 <sup>[j]</sup>  |
|                                            |                                   | BE (2 $\mu$ M)                   | $4.5 (\pm 0.3) \cdot 10^3$     | $4.1 (\pm 0.2) \cdot 10^{-4}$   | <i>kinIDA</i>                | 7.05 <sup>[j]</sup>  |
| nandrolone (2 $\mu$ M)                     | CB7 (2 $\mu$ M)                   |                                  |                                |                                 |                              |                      |
|                                            |                                   | BE (50 $\mu$ M)                  | $2.3 (\pm 0.4) \cdot 10^3$     | $2.0 (\pm 0.2) \cdot 10^{-4}$   | <i>kinGDA</i>                | 7.05 <sup>[j]</sup>  |
|                                            |                                   | BE (50 $\mu$ M)                  | $2.4 (\pm 0.5) \cdot 10^3$     | $2.1 (\pm 0.2) \cdot 10^{-4}$   | <i>kinGDA</i> <sup>PFO</sup> | 7.05 <sup>[j]</sup>  |
|                                            |                                   | MDAP (40 $\mu$ M)                | $9.2 (\pm 0.2) \cdot 10^3$     | $8.2 (\pm 0.8) \cdot 10^{-4}$   | <i>kinGDA</i>                | 7.05 <sup>[j]</sup>  |
|                                            |                                   | MDAP (40 $\mu$ M)                | $9.2 (\pm 0.2) \cdot 10^3$     | $8.3 (\pm 0.8) \cdot 10^{-4}$   | <i>kinGDA</i> <sup>PFO</sup> | 7.05 <sup>[j]</sup>  |
| cholesterol <sup>[f]</sup> (2.5 $\mu$ M)   | CB7 (2.2 $\mu$ M)                 |                                  |                                |                                 |                              |                      |
|                                            |                                   |                                  | $7.0 (\pm 0.1) \cdot 10^4$     | $8.7 (\pm 0.1) \cdot 10^{-2}$   | <i>kinGDA</i>                | 5.91 <sup>[h]</sup>  |
|                                            |                                   |                                  | $7.0 (\pm 0.1) \cdot 10^4$     | $8.7 (\pm 0.1) \cdot 10^{-2}$   | <i>kinGDA</i> <sup>PFO</sup> | 5.91 <sup>[h]</sup>  |
|                                            |                                   | BE (50 $\mu$ M)                  |                                |                                 |                              |                      |
|                                            |                                   |                                  | $4.2 (\pm 0.1) \cdot 10^4$     | $2.0 (\pm 0.1) \cdot 10^{-2}$   | <i>kinGDA</i>                | 6.25 <sup>[h]</sup>  |
| estradiol (3.9 $\mu$ M)                    | CB7 (3.9 $\mu$ M)                 |                                  |                                |                                 |                              |                      |
|                                            |                                   |                                  | $4.3 (\pm 0.1) \cdot 10^4$     | $2.1 (\pm 0.1) \cdot 10^{-2}$   | <i>kinGDA</i> <sup>PFO</sup> | 6.25 <sup>[h]</sup>  |
| AdOH (5 $\mu$ M)                           | CB7 <sup>[d]</sup> (1 $\mu$ M)    | BE (1.2 $\mu$ M)                 | $1.7 (\pm 0.1) \cdot 10^5$     | $6.6 (\pm 0.4) \cdot 10^{-6}$   | <i>kinIDA</i>                | 10.41                |
| (+)-fenchone (5.1 $\mu$ M)                 | CB7 (0.25 $\mu$ M)                | BE <sup>c</sup> (2.5 $\mu$ M)    | $9.2 (\pm 0.5) 10^4$           | $3.2 (\pm 0.1) 10^{-3}$         | <i>kinGDA</i>                | 7.45                 |
| norcamphor (0.35 $\mu$ M)                  | CB7 (0.25 $\mu$ M)                | BE <sup>c</sup> (32 $\mu$ M)     | $1.5 (\pm 0.1) 10^7$           | $9.8 (\pm 0.3) 10^{-2}$         | <i>kinGDA</i>                | 8.18                 |
| MPCP (0.2 $\mu$ M)                         | CB8 (0.1 $\mu$ M)                 |                                  | $1.2 (\pm 0.6) \cdot 10^7$     | $3.0 (\pm 1.6) \cdot 10^{-6}$   | <i>kinDBA</i>                | 12.59 <sup>[l]</sup> |
| MPCP (0.2 $\mu$ M)                         | CB8 <sup>[d]</sup> (0.2 $\mu$ M)  | –                                | $2.0 (\pm 1.0) \cdot 10^7$     | $5.1 (\pm 1.6) \cdot 10^{-6}$   | <i>kinDBA</i>                | 12.59 <sup>[l]</sup> |
| nandrolone (1 $\mu$ M)                     | CB8 (1 $\mu$ M)                   | MPCP (50 $\mu$ M)                | $1.1 (\pm 0.1) \cdot 10^7$     | $6.8 (\pm 0.4) \cdot 10^{-2}$   | <i>kinGDA</i>                | 8.19 <sup>[h]</sup>  |
|                                            |                                   |                                  | $1.1 (\pm 0.1) \cdot 10^7$     | $7.1 (\pm 0.2) \cdot 10^{-2}$   | <i>kinGDA</i> <sup>PFO</sup> | 8.19 <sup>[h]</sup>  |
| prednisolone (5 $\mu$ M)                   |                                   |                                  |                                |                                 |                              |                      |
|                                            |                                   |                                  | $1.6 (\pm 0.2) \cdot 10^6$     | $1.1 (\pm 0.1)$                 | <i>kinGDA</i>                | 6.15 <sup>[j]</sup>  |
|                                            |                                   |                                  | $1.5 (\pm 0.2) \cdot 10^6$     | $1.1 (\pm 0.1)$                 | <i>kinGDA</i> <sup>PFO</sup> | 6.15 <sup>[j]</sup>  |
| testosterone (5 $\mu$ M)                   | CB8 (5 $\mu$ M)                   | MPCP (50 $\mu$ M)                |                                |                                 |                              |                      |
|                                            |                                   |                                  | $6.4 (\pm 0.2) \cdot 10^5$     | $5.8 (\pm 0.2) \cdot 10^{-3}$   | <i>kinGDA</i>                | 8.04 <sup>[j]</sup>  |
|                                            |                                   |                                  | $6.4 (\pm 0.2) \cdot 10^5$     | $5.8 (\pm 0.2) \cdot 10^{-3}$   | <i>kinGDA</i> <sup>PFO</sup> | 8.04 <sup>[j]</sup>  |
| FeCp <sub>2</sub> OH (0.8 $\mu$ M)         | CB8 <sup>[d]</sup> (0.56 $\mu$ M) | MPCP (5.25 $\mu$ M)              |                                |                                 |                              |                      |
|                                            |                                   |                                  | $2.08 (\pm 0.13) \cdot 10^7$   | $5.77 (\pm 0.37)$               | <i>kinGDA</i>                | 6.56 <sup>[k]</sup>  |
|                                            |                                   |                                  | $2.04 (\pm 0.17) \cdot 10^7$   | $5.67 (\pm 0.17)$               | <i>kinGDA</i> <sup>PFO</sup> | 6.56 <sup>[k]</sup>  |
| AdOH (1.4 $\mu$ M)                         | CB8 <sup>[d]</sup> (1 $\mu$ M)    | MPCP (10 $\mu$ M)                |                                |                                 |                              |                      |
|                                            |                                   |                                  | $1.22 (\pm 0.03) \cdot 10^7$   | $1.97 (\pm 0.06)$               | <i>kinGDA</i>                | 6.79 <sup>[k]</sup>  |
|                                            |                                   |                                  | $1.22 (\pm 0.02) \cdot 10^7$   | $1.92 (\pm 0.02)$               | <i>kinGDA</i> <sup>PFO</sup> | 6.79 <sup>[k]</sup>  |
| warfarin <sup>[g]</sup> (100 $\mu$ M)      | HSA (20 $\mu$ M)                  | –                                | $6.7 (\pm 0.9) \cdot 10^5$     | $4.8 (\pm 0.6)$                 | <i>kinDBA</i>                | 5.15 <sup>[h]</sup>  |
| phenylbutazone <sup>[g]</sup> (40 $\mu$ M) | HSA (20 $\mu$ M)                  | warfarin (100 $\mu$ M)           | $6.6 (\pm 0.6) \cdot 10^5$     | $1.0 (\pm 0.1)$                 | <i>kinGDA</i>                | 5.83 <sup>[h]</sup>  |

If not stated differently all experiments have been conducted in deionized water at 25 °C. <sup>[a]</sup> mean and standard deviation in parenthesis of at least 3 independent measurements. <sup>[b]</sup> in deionized water with 8.23  $\mu$ M HCl. <sup>[c]</sup> BE was chromatographed on silica gel (Merck) column eluting with ethanol and water was freshly distilled three times from dilute KMnO<sub>4</sub> solution ref.<sup>12</sup> <sup>[d]</sup> desalted CB7/CB8 was used. <sup>[e]</sup> in sodium phosphate buffer (50 mM). <sup>[f]</sup> H<sub>2</sub>O/ethanol (99.9/0.1; v/v) mixture. <sup>[g]</sup> in PBS. <sup>[h]</sup> ref.<sup>13</sup> <sup>[i]</sup> calculated using the formula presented in ref.<sup>14</sup> <sup>[j]</sup> ref.<sup>3</sup> <sup>[k]</sup> determined by ITC. <sup>[l]</sup> ref.<sup>15</sup>. Note: *kinDBA* were conducted at several concentrations of the dye, fitted to the DBA algorithm and kinetic rate constants averaged. The ESI comprises exemplified data.

4.3.1 CB6 $\rightarrow$ DSMI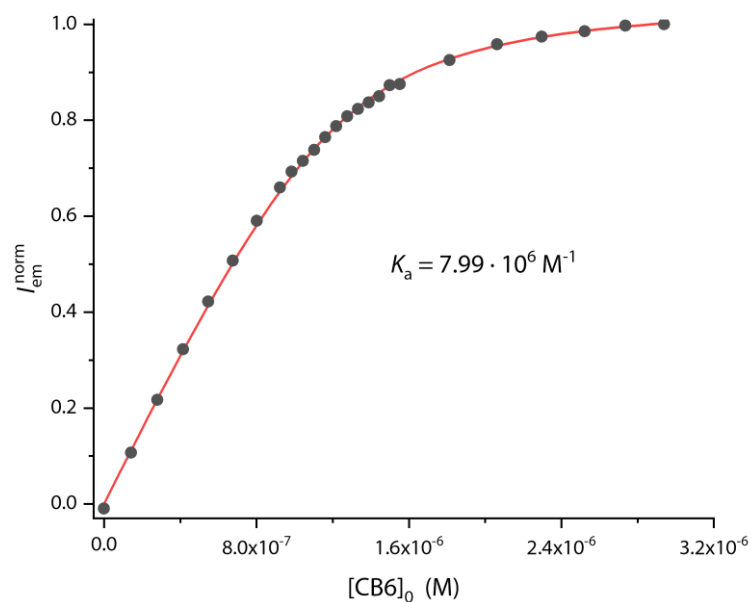

**Fig. S1:** Representative DBA binding isotherm determined by fluorescence intensity variations ( $\lambda_{exc} = 519 \text{ nm}$ ,  $\lambda_{em} = 575 \text{ nm}$ ) of DSMI ( $1.21 \mu\text{M}$ ) and CB6 ( $0 - 2.94 \mu\text{M}$ ) in water at  $25^\circ\text{C}$ . Acquired data is depicted as gray dots and fitted data as red line.

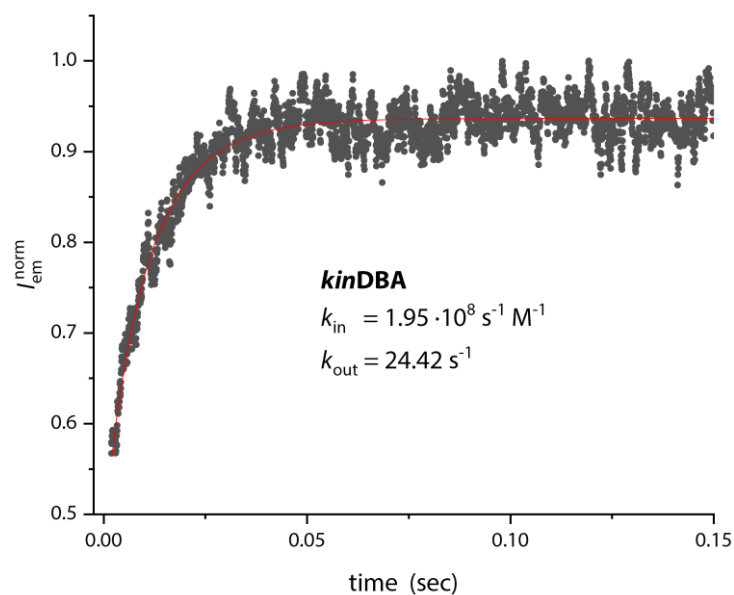

**Fig. S2:** Representative DBA kinetic binding curve determined by fluorescence intensity variations ( $\lambda_{exc} = 450 \text{ nm}$ ,  $\lambda_{em} = 575 \text{ nm}$ ) of DSMI ( $0.27 \mu\text{M}$ ) and CB6 ( $0.28 \mu\text{M}$ ) in water at  $25^\circ\text{C}$ . Acquired data are depicted as gray dots and fitted data as red line.

4.3.2 CB6 $\rightarrow$ 4-MBA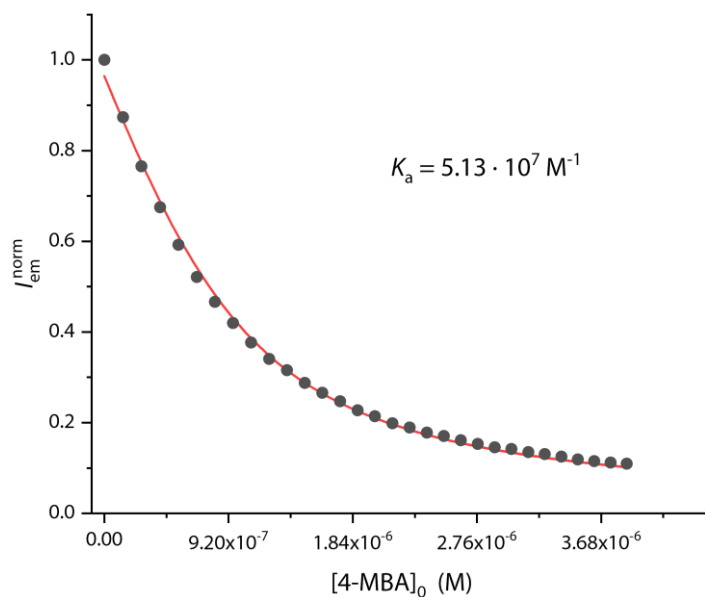

**Fig. S3:** Representative IDA binding isotherm determined by fluorescence intensity variations ( $\lambda_{exc} = 519$  nm,  $\lambda_{em} = 575$  nm) of DSMI (2.11  $\mu$ M), CB6 (1.03  $\mu$ M) and 4-MBA (0-3.87  $\mu$ M) in water (3.87  $\mu$ M HCl) at pH 7 at 25°C. Acquired data is depicted as gray dots and fitted data as red line.

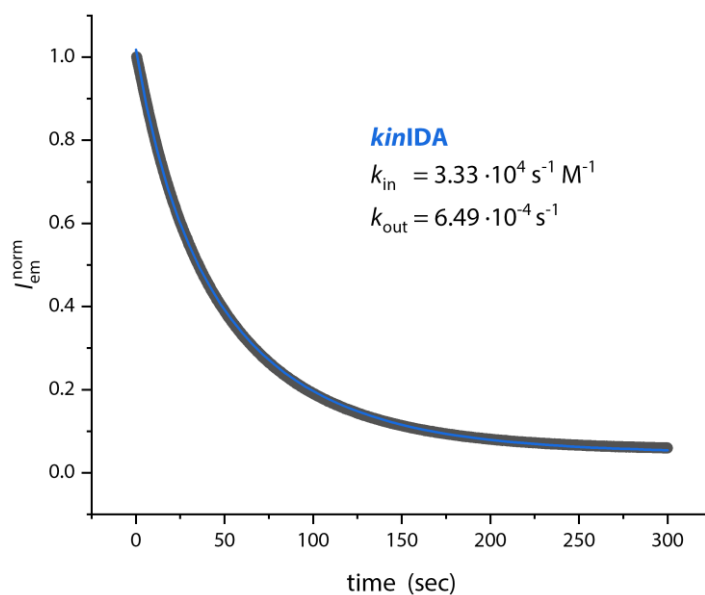

**Fig. S4:** Representative IDA kinetic binding curve determined by fluorescence intensity variations ( $\lambda_{exc} = 519$  nm,  $\lambda_{em} = 575$  nm) of DSMI (2.08  $\mu$ M), CB6 (1.05  $\mu$ M) and 4-MBA (8.23  $\mu$ M) in water (8.23  $\mu$ M HCl) at pH 7 at 25°C. Acquired data are depicted as gray dots and fitted data following the competitive binding model (Eq. S14) as blue line.



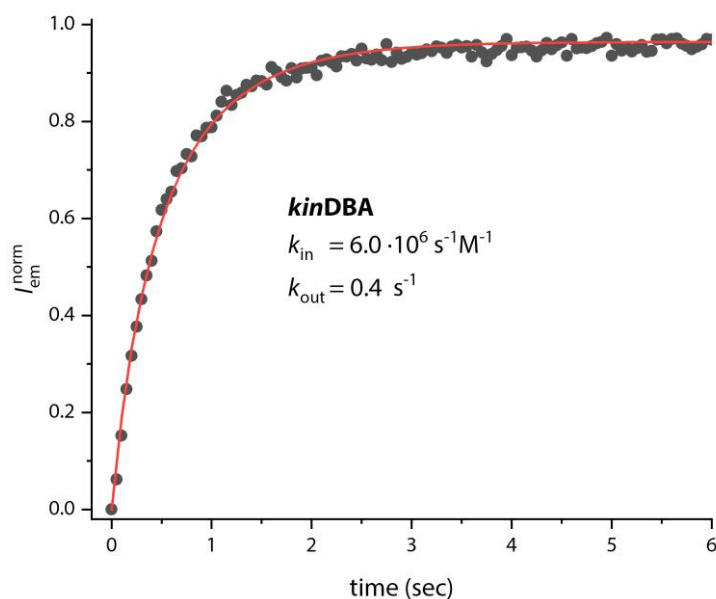

**Fig. S7:** Representative DBA kinetic binding curve determined by fluorescence intensity variations ( $\lambda_{exc} = 465 \text{ nm}$ ,  $\lambda_{em} = 525 \text{ nm}$ ) of BE (0.2  $\mu$ M) and CB7 (0.3  $\mu$ M) in water at 25°C. Acquired data are depicted as gray dots and fitted data as red line.

#### 4.3.4 CB7 $\supset$ MDAP

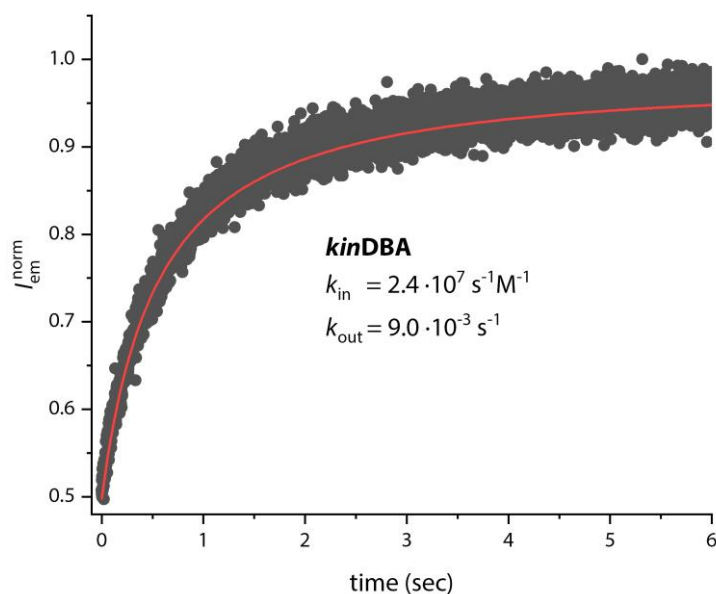

**Fig. S8:** Representative DBA kinetic binding curve determined by fluorescence intensity variations ( $\lambda_{exc} = 339 \text{ nm}$ ,  $\lambda_{em} = 454 \text{ nm}$ ) of MDAP (71 nM), and CB7 (72 nM) in water at 25°C. Acquired data are depicted as gray dots and fitted data as red line.

## 4.3.5 CB7⊃nandrolone

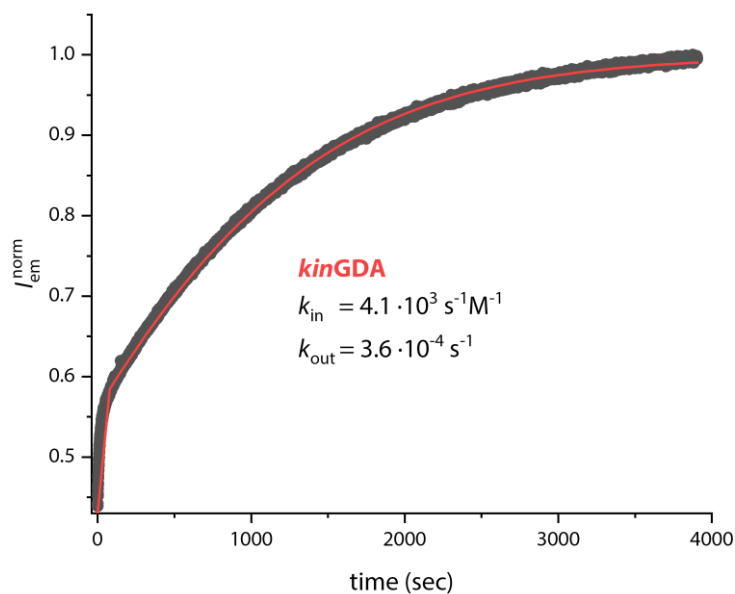

**Fig. S9:** Representative GDA kinetic binding curve determined by fluorescence intensity variations ( $\lambda_{exc} = 462$  nm,  $\lambda_{em} = 540$  nm) of BE (2  $\mu$ M), nandrolone (2  $\mu$ M) and CB7 (2  $\mu$ M) in water at 25°C. Acquired data are depicted as gray dots and fitted data following the competitive binding model (Eq. S14) as red line.

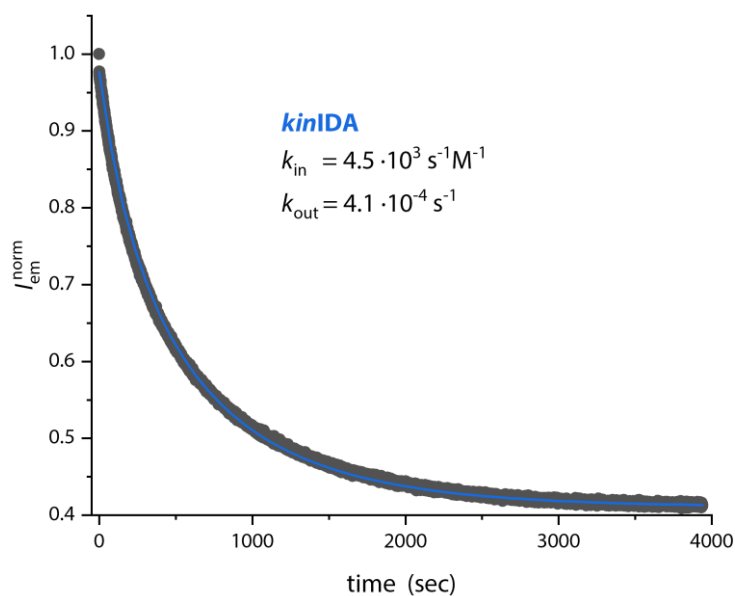

**Fig. S10:** IDA kinetic binding curve determined by fluorescence intensity variations ( $\lambda_{exc} = 462$  nm,  $\lambda_{em} = 540$  nm) of BE (2  $\mu$ M), nandrolone (2  $\mu$ M) and CB7 (2  $\mu$ M) in water at 25°C. Acquired data are depicted as gray dots and fitted data following the competitive binding model (Eq. S14) as blue line.



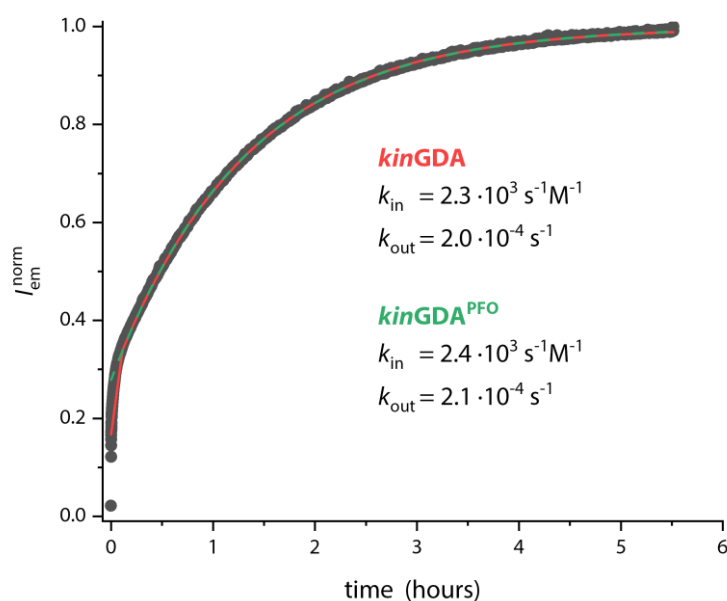

**Fig. S11:** Representative GDA kinetic binding curve determined by fluorescence intensity variations ( $\lambda_{exc} = 462 \text{ nm}$ ,  $\lambda_{em} = 540 \text{ nm}$ ) of BE ( $50 \mu\text{M}$ ), nandrolone ( $2 \mu\text{M}$ ) and CB7 ( $2 \mu\text{M}$ ) in water at  $25^\circ\text{C}$ . Acquired data are depicted as gray dots and fitted data following the competitive binding model (Eq. S14) as red line and following the pseudo-first order model (Eq. S22) as green line.

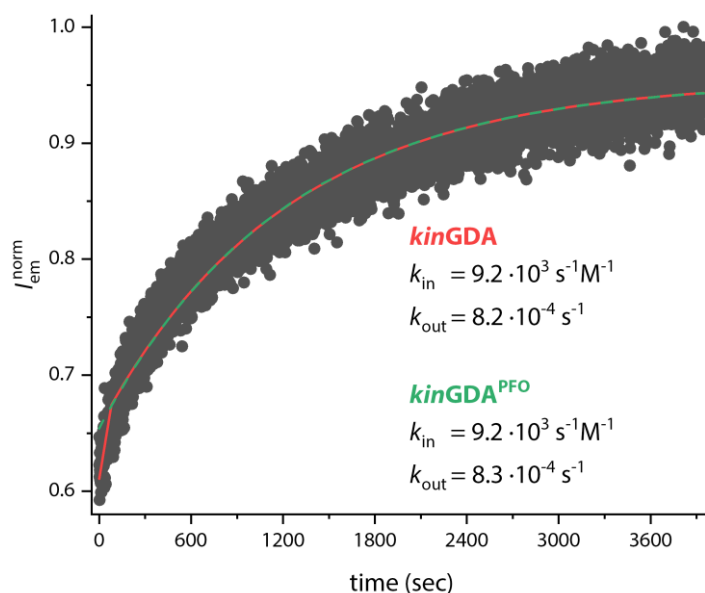

**Fig. S12:** Representative GDA kinetic binding curve determined by fluorescence intensity variations ( $\lambda_{exc} = 343 \text{ nm}$ ,  $\lambda_{em} = 454 \text{ nm}$ ) of MDAP ( $40 \mu\text{M}$ ), nandrolone ( $2 \mu\text{M}$ ) and CB7 ( $2 \mu\text{M}$ ) in water at  $25^\circ\text{C}$ . Acquired data are depicted as gray dots and fitted data following the competitive binding model (Eq. S14) as red line and following the pseudo-first order model (Eq. S22) as green line.

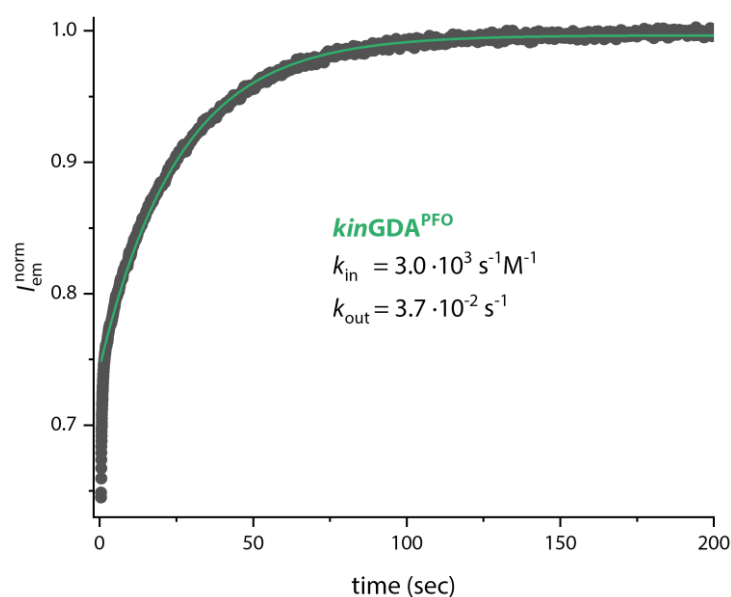

**Fig. S13:** Representative GDA kinetic binding curve determined by fluorescence intensity variations ( $\lambda_{exc} = 462 \text{ nm}$ ,  $\lambda_{em} = 550 \text{ nm}$ ) of BE ( $50 \mu\text{M}$ ), nandrolone ( $2 \mu\text{M}$ ) and CB7 ( $2 \mu\text{M}$ ) in sodium phosphate buffer ( $50 \text{ mM}$ ) at  $25^\circ\text{C}$ . Acquired data are depicted as gray dots and fitted data following the pseudo-first order model (Eq. S22) as green line.

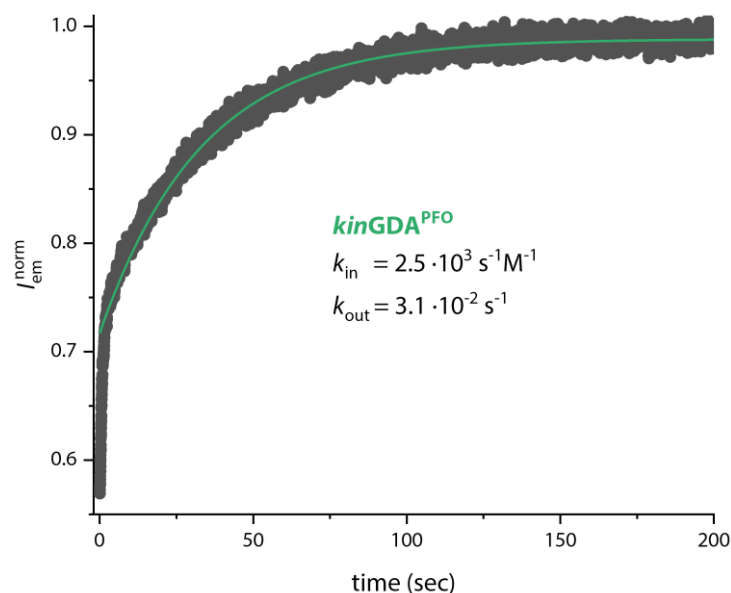

**Fig. S14:** Representative GDA kinetic binding curve determined by fluorescence intensity variations ( $\lambda_{exc} = 343 \text{ nm}$ ,  $\lambda_{em} = 454 \text{ nm}$ ) of MDAP ( $25 \mu\text{M}$ ), nandrolone ( $2 \mu\text{M}$ ) and CB7 ( $2 \mu\text{M}$ ) in sodium phosphate buffer ( $50 \text{ mM}$ ) at  $25^\circ\text{C}$ . Acquired data are depicted as gray dots and fitted data following the pseudo-first order model (Eq. S22) as green line.

4.3.6 CB7 $\supset$ cholesterol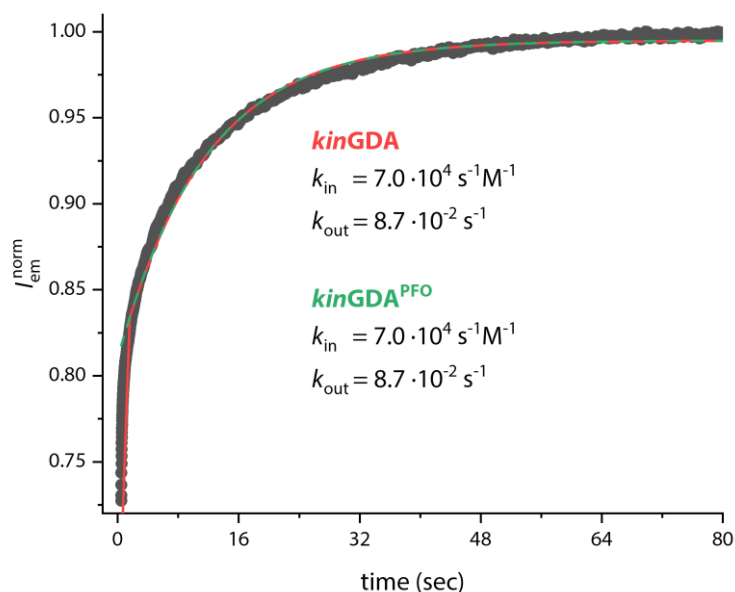

**Fig. S15:** Representative GDA kinetic binding curve determined by fluorescence intensity variations ( $\lambda_{exc} = 462 \text{ nm}$ ,  $\lambda_{em} = 550 \text{ nm}$ ) of BE ( $50 \mu\text{M}$ ), cholesterol ( $2.45 \mu\text{M}$ ) and CB7 ( $2.22 \mu\text{M}$ ) in water/ethanol (99.9/0.1, v/v) mixture at  $25^\circ\text{C}$ . Acquired data are depicted as gray dots and fitted data following the competitive binding model (Eq. S14) as red line and following the pseudo-first order model (Eq. S22) as green line.

4.3.7 CB7 $\supset$ estradiol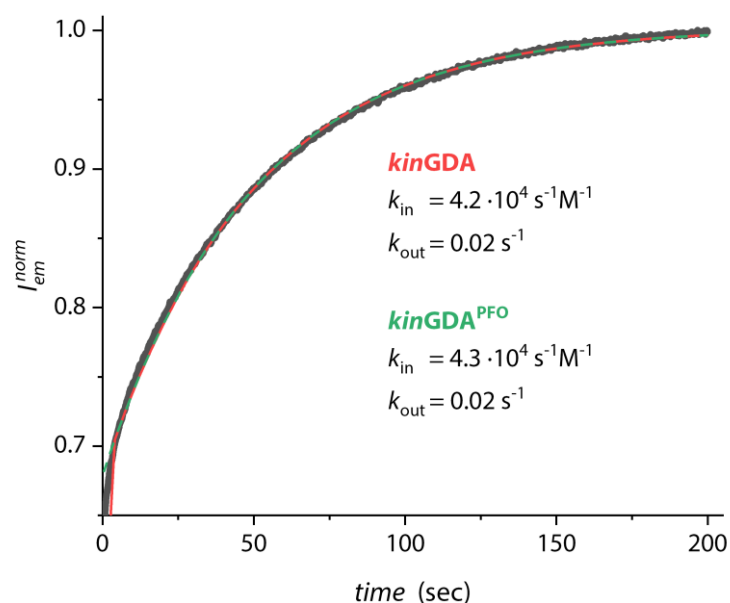

**Fig. S16:** Representative GDA kinetic binding curve determined by fluorescence intensity variations ( $\lambda_{exc} = 462 \text{ nm}$ ,  $\lambda_{em} = 550 \text{ nm}$ ) of BE ( $50 \mu\text{M}$ ), estradiol ( $3.9 \mu\text{M}$ ) and CB7 ( $3.9 \mu\text{M}$ ) in water at  $25^\circ\text{C}$ . Acquired data are depicted as gray dots and fitted data following the competitive binding model (Eq. S14) as red line and following the pseudo-first order model (Eq. S22) as green line.

## 4.3.8 CB7(desalted)⊃BE

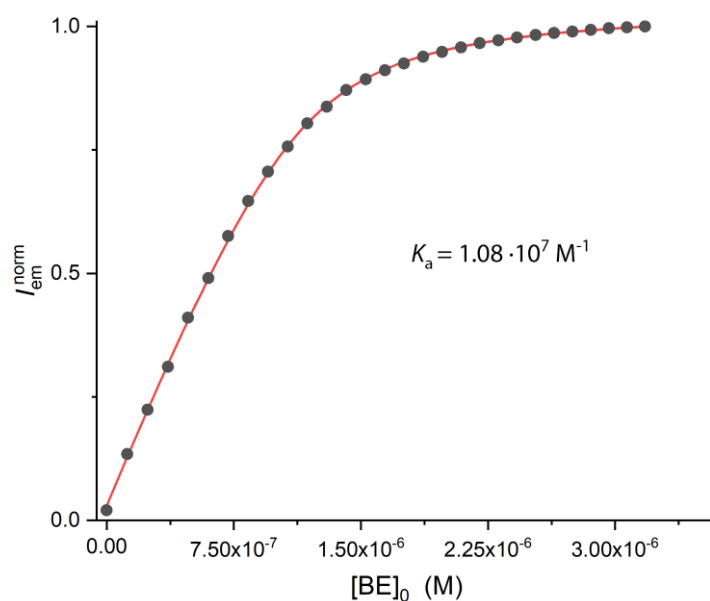

**Figure S17:** Representative DBA binding isotherm determined by fluorescence intensity variations ( $\lambda_{\text{exc}} = 440 \text{ nm}$ ,  $\lambda_{\text{em}} = 542 \text{ nm}$ ) of desalted CB7 ( $1.15 \mu\text{M}$ ) and BE ( $0\text{-}3.2 \mu\text{M}$ ) in water at  $25^\circ\text{C}$ . Acquired data are depicted as gray dots and fitted data as red line.

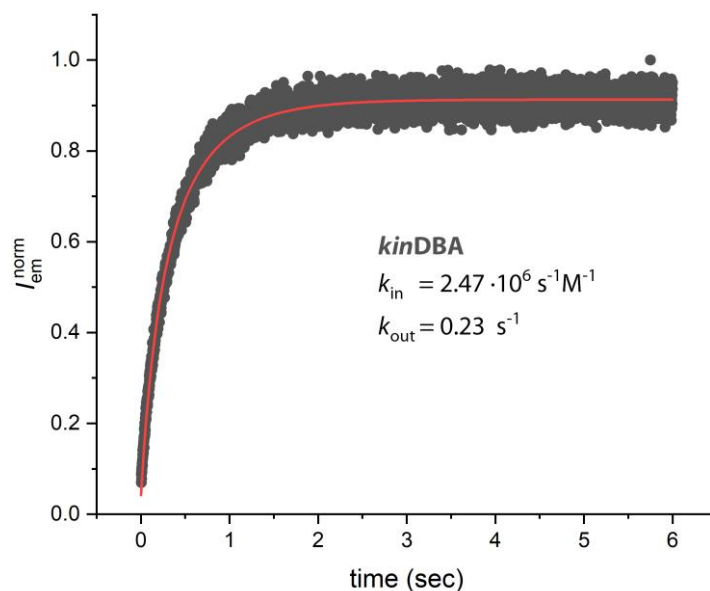

**Figure S18:** Representative DBA kinetic binding curve determined by fluorescence intensity variations ( $\lambda_{\text{exc}} = 430 \text{ nm}$ ,  $\lambda_{\text{em}} = 530 \text{ nm}$ ) of BE ( $1.2 \mu\text{M}$ ) and desalted CB7 ( $1 \mu\text{M}$ ) in water at  $25^\circ\text{C}$ . Acquired data are depicted as gray dots and fitted data as red line.

## 4.3.9 CB7(desalted)⊃adamantanol

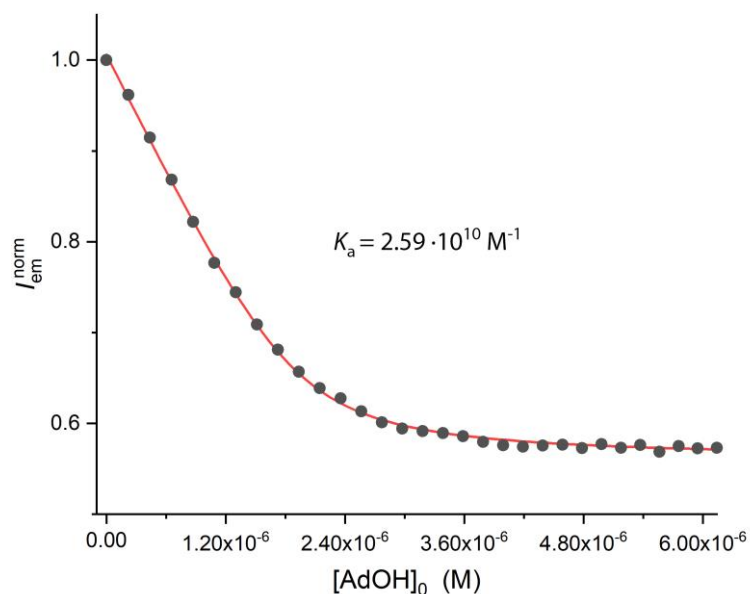

**Figure S19:** Representative IDA binding isotherm determined by fluorescence intensity variations ( $\lambda_{exc} = 378 \text{ nm}$ ,  $\lambda_{em} = 427.5 \text{ nm}$ ) of MDAP ( $3.0 \mu\text{M}$ ), desalted CB7 ( $2.0 \mu\text{M}$ ) and AdOH ( $0\text{-}6 \mu\text{M}$ ) in water at  $25^\circ\text{C}$ . Acquired data are depicted as gray dots and fitted data as red line.

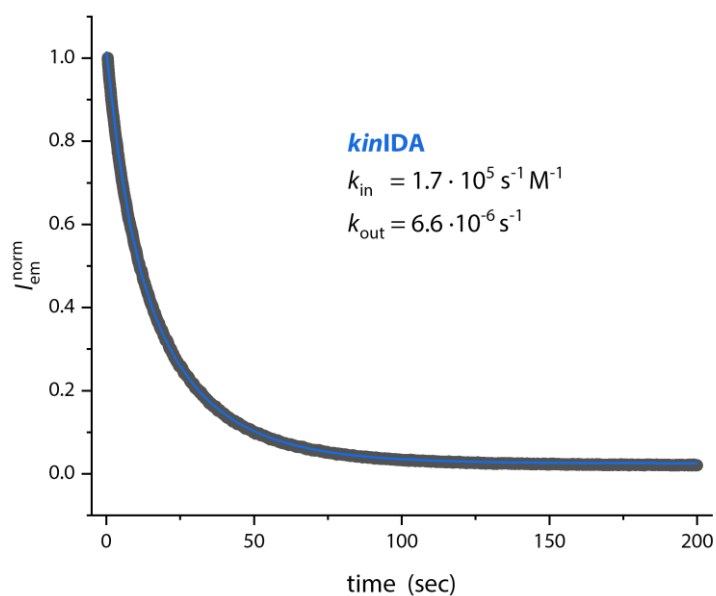

**Fig. S20:** Representative IDA binding curve determined by fluorescence intensity ( $\lambda_{exc} = 430 \text{ nm}$  and  $\lambda_{em} = 530 \text{ nm}$ ) of BE ( $1.2 \mu\text{M}$ ), CB7 ( $1 \mu\text{M}$ ) and adamantanol ( $5 \mu\text{M}$ ) in water at  $25^\circ\text{C}$ . Acquired data are depicted as gray dots and fitted data following the competitive binding model (Eq. S14) as blue line.

4.3.10 CB7 $\supset$ (+)-fenchone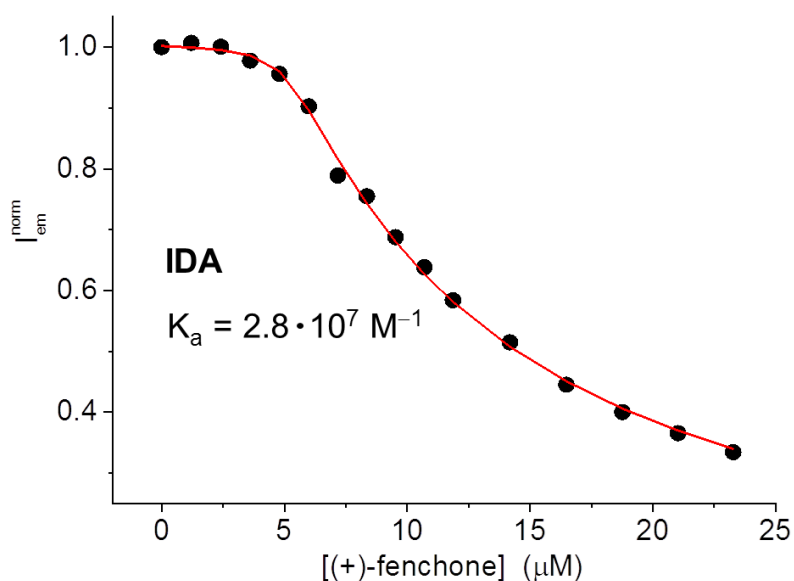

**Fig. S21:** Representative IDA binding curve determined at 25°C by fluorescence intensity variations ( $\lambda_{exc} = 345 \text{ nm}$ ,  $\lambda_{em} = 503 \text{ nm}$ ) of chromatographically purified BE (5.0  $\mu\text{M}$ ), (+)-fenchone (0 - 23  $\mu\text{M}$ ) and CB7 (10.2  $\mu\text{M}$ ) in water freshly distilled three times from dilute  $\text{KMnO}_4$  solution. Acquired data are depicted as black dots and fitted data as red line.

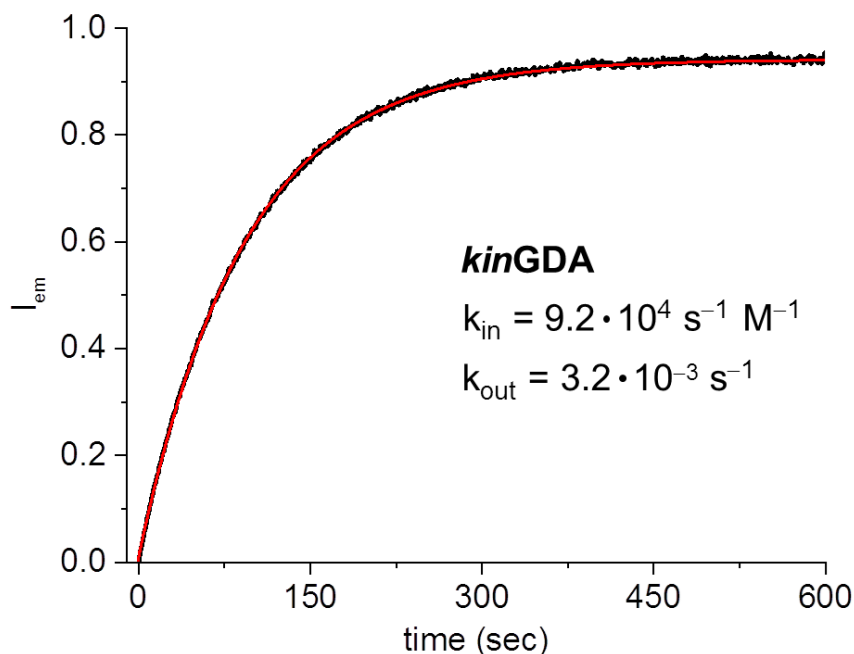

**Fig. S22:** Representative GDA kinetic binding curve determined at 25°C by fluorescence intensity variations ( $\lambda_{exc} = 345 \text{ nm}$ ,  $\lambda_{em} = 505 \text{ nm}$ ) of chromatographically purified BE (2.5  $\mu\text{M}$ ), (+)-fenchone (5.1  $\mu\text{M}$ ) and CB7 (0.25  $\mu\text{M}$ ) in water freshly distilled three times from dilute  $\text{KMnO}_4$  solution. Acquired data are depicted as black line and fitted data following the competitive binding model (Eq. S14) as red line.

4.3.11 CB7 $\supset$ norcamphor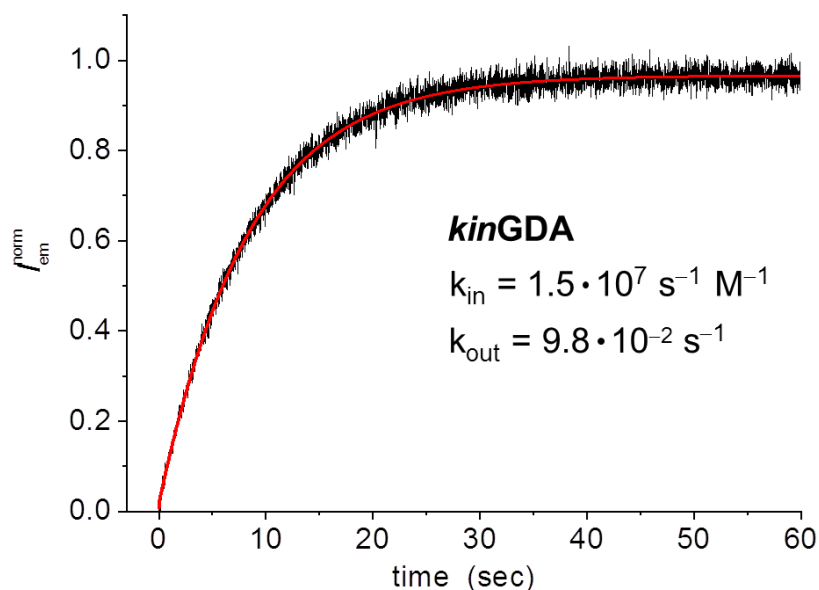

**Fig. S23:** Representative GDA kinetic binding curve determined at 25°C by fluorescence intensity variations ( $\lambda_{exc} = 422 \text{ nm}$ ,  $\lambda_{em} = 510 \text{ nm}$ ) of chromatographically purified BE (32  $\mu\text{M}$ ), norcamphor (0.35  $\mu\text{M}$ ) and CB7 (0.25  $\mu\text{M}$ ) in water freshly distilled three times from dilute  $\text{KMnO}_4$  solution. Acquired data are depicted as black line and fitted data following the competitive binding model (Eq. S14) as red line.

4.3.12 CB8 $\supset$ MPCP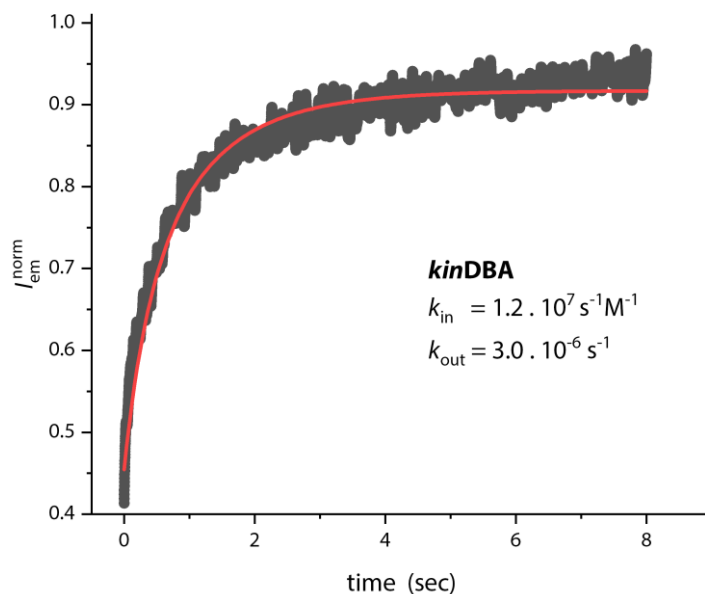

**Fig. S24:** Representative DBA kinetic binding curve determined by fluorescence intensity variations ( $\lambda_{exc} = 366 \text{ nm}$ ,  $\lambda_{em} = 533 \text{ nm}$ ) of MPCP (0.2  $\mu\text{M}$ ) and CB8 (0.1  $\mu\text{M}$ ) in water at 25°C. Acquired data are depicted as gray dots and fitted data as red line. Note: Data was smoothed before fitting (25 points Savitzky-Golay).

4.3.13 CB8  $\rightarrow$  nandrolone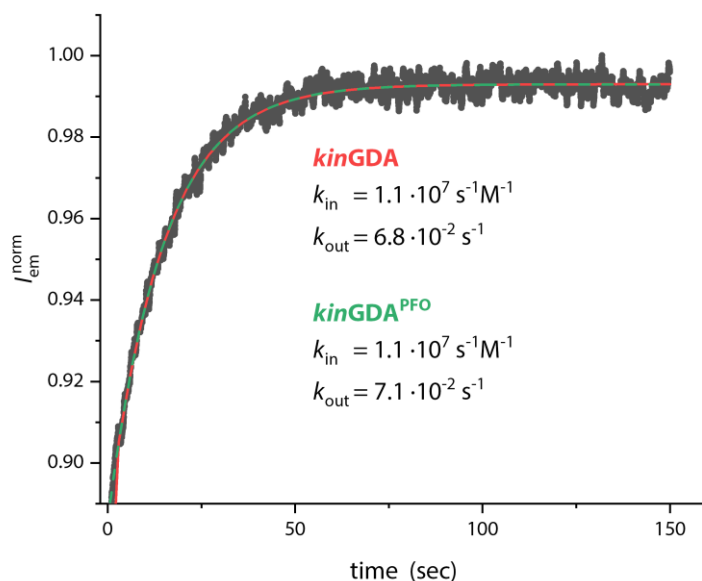

**Fig. S25:** Representative GDA kinetic binding curve determined by fluorescence intensity variations ( $\lambda_{exc} = 366 \text{ nm}$ ,  $\lambda_{em} = 533 \text{ nm}$ ) of MPCP ( $50 \mu\text{M}$ ), nandrolone ( $1 \mu\text{M}$ ) and CB8 ( $1 \mu\text{M}$ ) in water at  $25^\circ\text{C}$ . Acquired data are depicted as gray dots and fitted data following the competitive binding model (Eq. S14) as red line and following the pseudo-first order model (Eq. S22) as green line.

4.3.14 CB8  $\rightarrow$  testosterone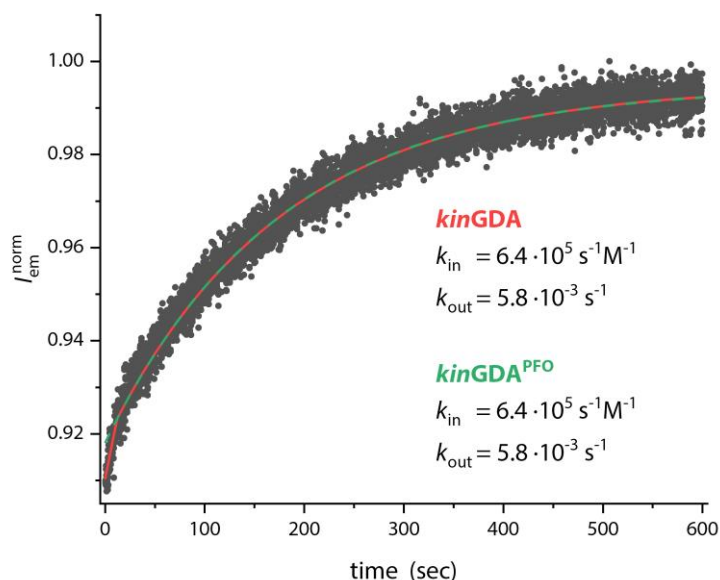

**Fig. S26:** Representative GDA kinetic binding curve determined by fluorescence intensity variations ( $\lambda_{exc} = 366 \text{ nm}$ ,  $\lambda_{em} = 533 \text{ nm}$ ) of MPCP ( $50 \mu\text{M}$ ), testosterone ( $5 \mu\text{M}$ ) and CB8 ( $5 \mu\text{M}$ ) in water at  $25^\circ\text{C}$ . Acquired data are depicted as gray dots and fitted data following the competitive binding model (Eq. S14) as red line and following the pseudo-first order model (Eq. S22) as green line.



4.3.15 CB8 $\rightarrow$ prednisolone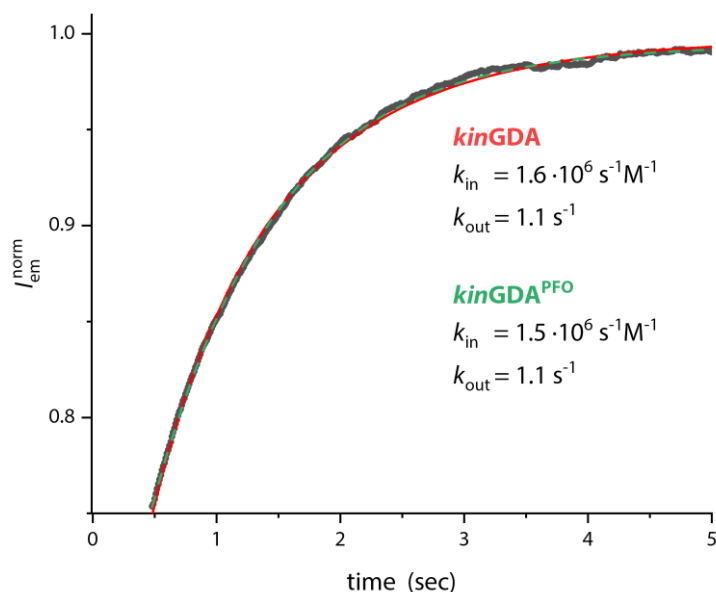

**Fig. S27:** Representative GDA kinetic binding curve determined by fluorescence intensity variations ( $\lambda_{exc} = 366 \text{ nm}$ ,  $\lambda_{em} = 533 \text{ nm}$ ) of MPCP ( $50 \mu\text{M}$ ), prednisolone ( $5 \mu\text{M}$ ) and CB8 ( $5 \mu\text{M}$ ) in water at  $25^\circ\text{C}$ . Acquired data are depicted as gray dots and fitted data following the competitive binding model (Eq. S14) as red line and following the pseudo-first order model (Eq. S22) as green line.

4.3.16 CB8(desalted) $\rightarrow$ MPCP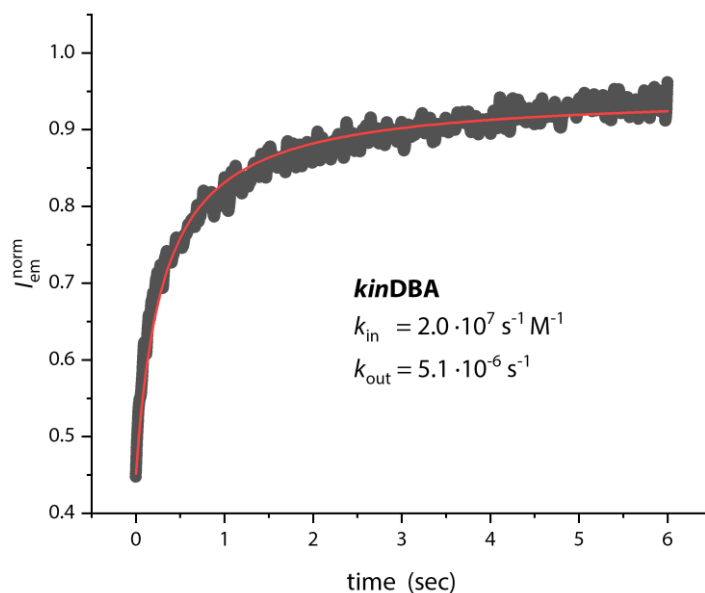

**Fig. S28:** Representative DBA kinetic binding curve determined by fluorescence intensity variations ( $\lambda_{exc} = 366 \text{ nm}$ ,  $\lambda_{em} = 533 \text{ nm}$ ) of MPCP ( $0.2 \mu\text{M}$ ) and desalted CB8 ( $0.21 \mu\text{M}$ ) in water at  $25^\circ\text{C}$ . Acquired data are depicted as gray dots and fitted data as red line. Note: Data was smoothed before fitting (25 points Savitzky-Golay).

## 4.3.17 CB8(desalted)⊃adamantanol

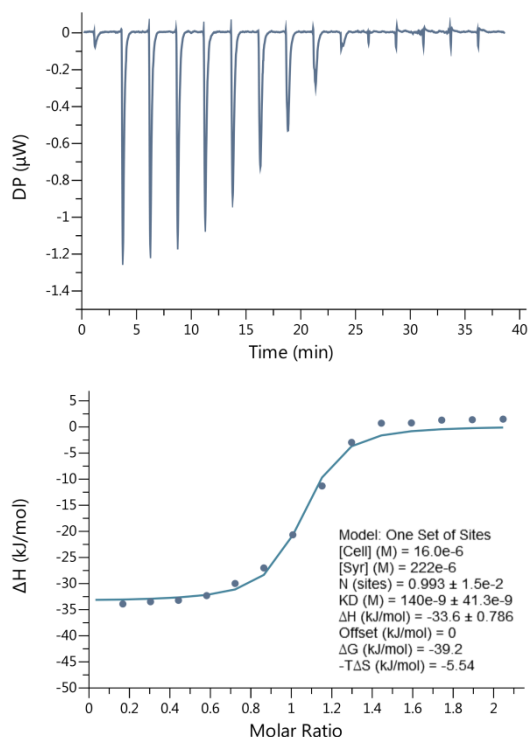

**Fig. S29:** Representative ITC isotherms of desalted CB8 (16  $\mu\text{M}$ ) and 1-adamantanol (0 – 40  $\mu\text{M}$ ) in water at 25°C.

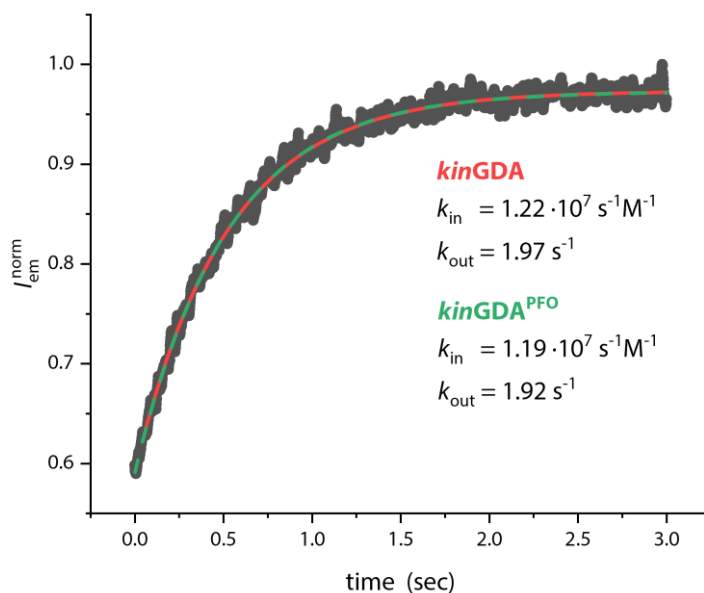

**Fig. S30:** Representative GDA kinetic binding curve determined by fluorescence intensity variations ( $\lambda_{\text{exc}} = 366 \text{ nm}$ ,  $\lambda_{\text{em}} = 533 \text{ nm}$ ) of MPCP (10  $\mu\text{M}$ ), adamantanol (1.43  $\mu\text{M}$ ) and desalted CB8 (1  $\mu\text{M}$ ) in water at 25°C. Acquired data are depicted as gray dots and fitted data following the competitive binding model (Eq. S14) as red line and following the pseudo-first order model (Eq. S22) as green line. Note: Data was smoothed before fitting (25 points Savitzky-Golay).

## 4.3.18 CB8(desalted)⇌ferrocenyl methanol

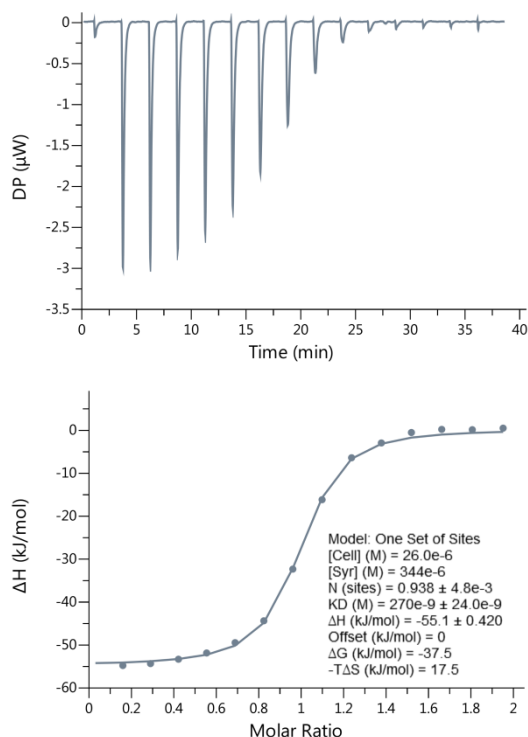

**Fig. S31:** Representative ITC isotherms of desalted CB8 (26  $\mu\text{M}$ ) and ferrocenyl methanol (0 – 60  $\mu\text{M}$ ) in water at 25°C.

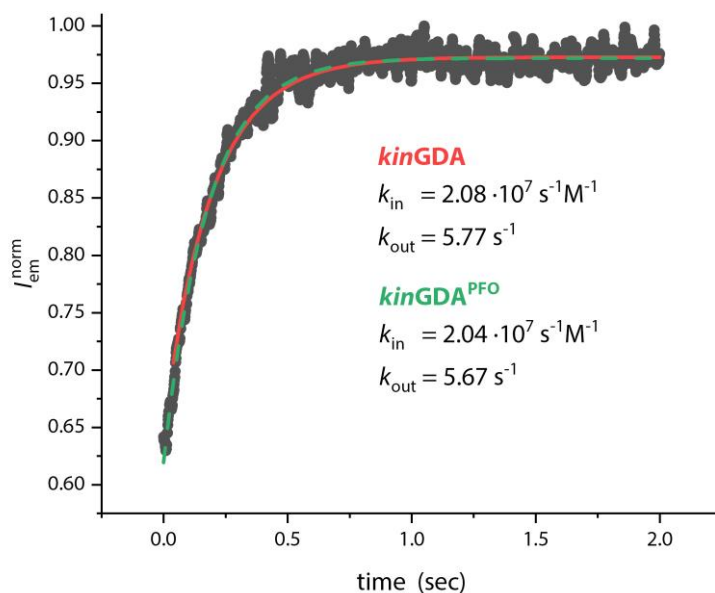

**Fig. S32:** Representative GDA kinetic binding curve determined by fluorescence intensity variations ( $\lambda_{exc} = 366 \text{ nm}$ ,  $\lambda_{em} = 533 \text{ nm}$ ) of MPCP (5.25  $\mu\text{M}$ ), ferrocenyl methanol (0.8  $\mu\text{M}$ ) and desalted CB8 (0.56  $\mu\text{M}$ ) in water at 25°C. Acquired data are depicted as gray dots and fitted data following the competitive binding model (Eq. S14) as red line and following the pseudo-first order model (Eq. S22) as green line. Note: Data was smoothed before fitting (25 points Savitzky-Golay).

4.3.19 HSA $\rightarrow$ warfarin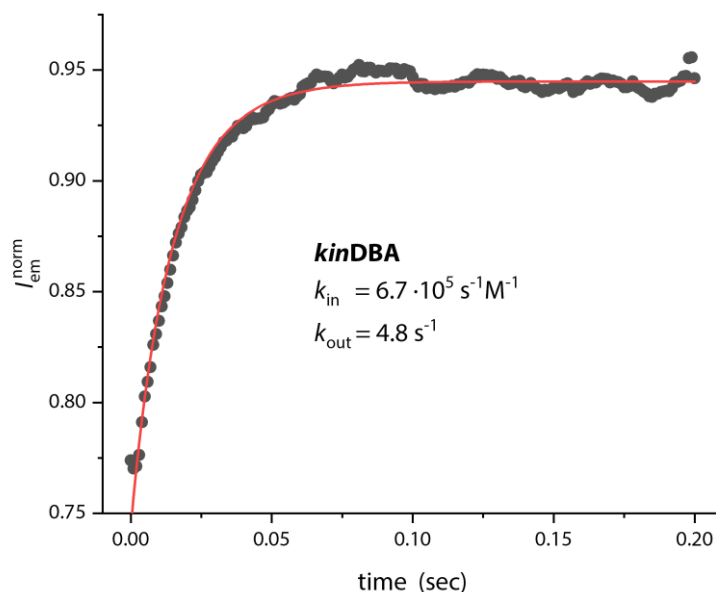

**Fig. S33:** Representative DBA kinetic binding curve determined by fluorescence intensity variations ( $\lambda_{exc} = 335 \text{ nm}$ ,  $\lambda_{em} = 410 \text{ nm}$ ) of warfarin ( $100 \mu\text{M}$ ) and HSA ( $20 \mu\text{M}$ ) in PBS at  $25^\circ\text{C}$ . Acquired data are depicted as gray dots and fitted data as red line. Note: Experimental data was smoothed for depiction (20 points adjacent averaging).

4.3.20 HSA $\rightarrow$ phenylbutazone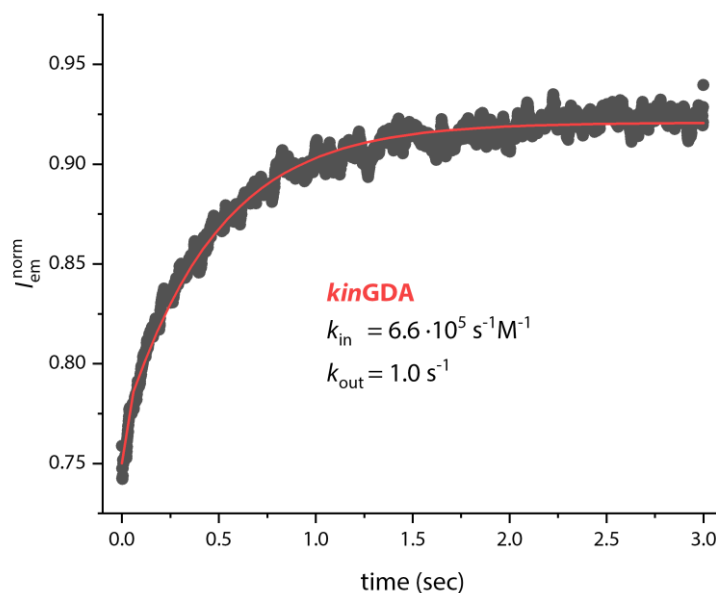

**Fig. S34:** Representative GDA kinetic binding curve determined by fluorescence intensity variations ( $\lambda_{exc} = 335 \text{ nm}$ ,  $\lambda_{em} = 410 \text{ nm}$ ) of warfarin ( $100 \mu\text{M}$ ), PBZ ( $40 \mu\text{M}$ ) and HSA ( $20 \mu\text{M}$ ) in PBS at  $25^\circ\text{C}$ . Acquired data are depicted as gray dots and fitted data following the competitive binding model (Eq. S14) as red line. Note: Experimental data was smoothed for depiction (20 points adjacent averaging).

## 5 Kinetic and Thermodynamic Correlation Analysis

### 5.1 Van't Hoff and Eyring Equations

$$\Delta G = -RT \cdot \ln K_a \quad \text{Eq. S23}$$

$$\Delta G_{in}^{\#} = -RT \cdot \ln \left( \frac{k_{in}}{k_B T / h} \right) \quad \text{Eq. S24}$$

$$\Delta G_{out}^{\#} = -RT \cdot \ln \left( \frac{k_{out}}{k_B T / h} \right) \quad \text{Eq. S25}$$

R – universal gas constant (8.3145 J K<sup>-1</sup> mol<sup>-1</sup>),

k<sub>B</sub> – Boltzmann constant (1.381·10<sup>-23</sup> J K<sup>-1</sup>),

T – temperature (in K),

h – Planck constant (6.63·10<sup>-34</sup> J s),

K<sub>a</sub> – binding constant,

ΔG – Gibbs free energy for the formation (association) of the complex,

k<sub>in</sub> – kinetic rate constant for the association of the complex (complexation),

ΔG<sub>in</sub><sup>#</sup> – Gibbs energy of activation for the association of the complex,

k<sub>out</sub> – kinetic rate constant for the dissociation of the complex (decomplexation),

ΔG<sub>out</sub><sup>#</sup> – Gibbs energy of activation for the dissociation of the complex,

Note: This approach assumes a conversion towards the products from a single transition state (either for association or for dissociation) and thus the transmission coefficient κ is taken to be unity.<sup>16</sup>

Representative CB6 complexes that were slow enough to be determined by NMR binding studies (*kin*DBA), were obtained in solvent mixtures or buffers due to solubility limitations.<sup>17, 18</sup>

## 5.2 Correlation Data

**Table S4:** Data used for correlation analysis in Figure 4 (main text). If not stated differently, values are acquired in this work by fluorescence titration and listed in Table S3.

| host | guest                                                                            | T / °C | log ( $K_a$ / M <sup>-1</sup> ) | $k_{in}$ / M <sup>-1</sup> s <sup>-1</sup> | $k_{out}$ / s <sup>-1</sup> | $\Delta G$ / kJ mol <sup>-1</sup> | $\Delta G_{in}^\#$ / kJ mol <sup>-1</sup> | $\Delta G_{out}^\#$ / kJ mol <sup>-1</sup> |
|------|----------------------------------------------------------------------------------|--------|---------------------------------|--------------------------------------------|-----------------------------|-----------------------------------|-------------------------------------------|--------------------------------------------|
| CB6  | DSMI                                                                             | 25     | 6.90                            | $2.0 \cdot 10^8$                           | $2.44 \cdot 10^1$           | -39.4                             | 25.7                                      | 65.1                                       |
| CB6  | 4-MBA [a]                                                                        | 25     | 7.71                            | $3.3 \cdot 10^4$                           | $6.49 \cdot 10^{-4}$        | -44.0                             | 47.2                                      | 91.2                                       |
| CB6  | cyclobutylmethylamine <sup>17</sup>                                              | 40     | 5.57                            | $5.9 \cdot 10^3$                           | $1.6 \cdot 10^{-2}$         | -33.4                             | 54.2                                      | 87.6                                       |
| CB6  | cyclopentylmethylamine <sup>17</sup>                                             | 40     | 5.52                            | 5.5                                        | $1.6 \cdot 10^{-5}$         | -33.1                             | 72.4                                      | 105.6                                      |
| CB6  | cyclohexylmethylamine <sup>17</sup>                                              | 40     | 1.90                            | $8.8 \cdot 10^{-4}$                        | $1.1 \cdot 10^{-5}$         | -11.4                             | 95.1                                      | 106.6                                      |
| CB6  | 4-MBA [b] <sup>18</sup>                                                          | 40     | 2.51                            | 2.7                                        | $8.5 \cdot 10^{-3}$         | -15.0                             | 74.2                                      | 89.2                                       |
| CB6  | cyclohexylmethylamine Na <sup>+</sup> <sup>18</sup>                              | 25     | 1.67                            | $2.4 \cdot 10^{-4}$                        | $5.1 \cdot 10^{-6}$         | -9.5                              | 93.7                                      | 103.2                                      |
| CB6  | cyclohexylmethylamine K <sup>+</sup> <sup>18</sup>                               | 25     | 1.83                            | $2.6 \cdot 10^{-4}$                        | $3.9 \cdot 10^{-6}$         | -10.4                             | 93.5                                      | 103.9                                      |
| CB6  | cyclohexylmethylamine Rb <sup>+</sup> <sup>18</sup>                              | 25     | 1.92                            | $3.2 \cdot 10^{-4}$                        | $3.8 \cdot 10^{-6}$         | -11.0                             | 93.0                                      | 104.0                                      |
| CB6  | cyclohexylmethylamine Cs <sup>+</sup> <sup>18</sup>                              | 25     | 1.95                            | $4.5 \cdot 10^{-4}$                        | $5.0 \cdot 10^{-6}$         | -11.2                             | 92.1                                      | 103.3                                      |
| CB6  | 1,4-diaminocyclohexane <sup>19</sup>                                             | 25     | 6.15                            | $1.2 \cdot 10^{-3}$                        | $8.5 \cdot 10^{-10}$        | -35.1                             | 89.7                                      | 124.8                                      |
| CB6  | N-butyladamantan-1-aminium <sup>19</sup>                                         | 25     | 7.30                            | $4.4 \cdot 10^4$                           | $2.2 \cdot 10^{-3}$         | -41.7                             | 46.5                                      | 88.2                                       |
| CB7  | nandrolone                                                                       | 25     | 7.05                            | $4.1 \cdot 10^3$                           | $3.6 \cdot 10^{-4}$         | -40.2                             | 52.4                                      | 92.7                                       |
| CB7  | estradiol                                                                        | 25     | 6.25                            | $4.2 \cdot 10^4$                           | $2.0 \cdot 10^{-2}$         | -36.1                             | 46.6                                      | 82.7                                       |
| CB7  | BE                                                                               | 25     | 7.23                            | $6.0 \cdot 10^6$                           | $3.5 \cdot 10^{-1}$         | -41.3                             | 34.4                                      | 75.6                                       |
| CB7  | cholesterol                                                                      | 25     | 5.91                            | $7.0 \cdot 10^4$                           | $8.7 \cdot 10^{-2}$         | -33.7                             | 45.4                                      | 79.1                                       |
| CB7  | MDAP                                                                             | 25     | 9.43                            | $2.4 \cdot 10^7$                           | $9.0 \cdot 10^{-3}$         | -53.8                             | 30.9                                      | 84.7                                       |
| CB7  | (+)-fenchone                                                                     | 25     | 7.46                            | $3.2 \cdot 10^4$                           | $3.2 \cdot 10^{-3}$         | -42.6                             | 44.7                                      | 87.3                                       |
| CB7  | norcamphor                                                                       | 25     | 8.18                            | $1.5 \cdot 10^7$                           | $9.8 \cdot 10^{-2}$         | -46.7                             | 32.1                                      | 78.8                                       |
| CB7  | Flavopereirine perchlorate <sup>20</sup>                                         | 25     | 7.79                            | $9.0 \cdot 10^7$                           | 1.6                         | -44.4                             | 27.6                                      | 71.9                                       |
| CB7  | BE <sup>12</sup>                                                                 | 10     | 7.72                            | $8.8 \cdot 10^6$                           | $1.6 \cdot 10^{-1}$         | -41.9                             | 31.6                                      | 73.5                                       |
| CB7  | BE <sup>12</sup>                                                                 | 25     | 7.37                            | $1.9 \cdot 10^7$                           | $8.1 \cdot 10^{-1}$         | -42.1                             | 31.5                                      | 73.5                                       |
| CB7  | ((trimethylamino)methyl)ferrocene <sup>21</sup>                                  | 25     | 11.52                           | $2.0 \cdot 10^7$                           | $7.0 \cdot 10^{-5}$         | -65.8                             | 31.3                                      | 96.7                                       |
| CB7  | R-(+)-2-naphthyl-1-ethylammonium cation <sup>22</sup>                            | 25     | 7.03                            | $6.3 \cdot 10^8$                           | $5.5 \cdot 10^1$            | -40.1                             | 22.8                                      | 63.1                                       |
| CB7  | N-butyladamantan-1-aminium <sup>19</sup>                                         | 25     | 12.00                           | $2.4 \cdot 10^7$                           | $2.4 \cdot 10^{-5}$         | -68.5                             | 30.9                                      | 99.4                                       |
| CB7  | 1,4-diaminocyclohexane <sup>19</sup>                                             | 25     | 8.36                            | $6.0 \cdot 10^8$                           | 2.7                         | -47.7                             | 22.9                                      | 70.6                                       |
| CB7  | 6-methoxy-1-methylquinolinium <sup>23</sup>                                      | 24     | 6.30                            | $3.0 \cdot 10^9$                           | $1.5 \cdot 10^3$            | -35.8                             | 18.9                                      | 54.7                                       |
| CB7  | bis(3,5-dimethoxybenzyl)-4,4'-bipyridinium <sup>24</sup>                         | 25     | >3.53                           | $3.0 \cdot 10^{-1}$                        | $8.0 \cdot 10^{-5}$         | <-20.2                            | 76.0                                      | 96.4                                       |
| CB7  | bis(3,5-diethoxybenzyl)-4,4'-bipyridinium <sup>24</sup>                          | 25     | >5.9                            | $9.0 \cdot 10^{-1}$                        | $1.0 \cdot 10^{-6}$         | < -33.7                           | 73.3                                      | 107.3                                      |
| CB7  | 3',4',7-trimethoxyflavylium ion <sup>25</sup>                                    | 20     | 6.19                            | $7.7 \cdot 10^7$                           | $5.0 \cdot 10^1$            | -34.7                             | 27.5                                      | 62.2                                       |
| CB7  | 2-aminoanthracenium cation <sup>26</sup>                                         | 20     | 6.36                            | $2.3 \cdot 10^7$                           | $1.0 \cdot 10^1$            | -35.7                             | 30.4                                      | 66.1                                       |
| CB7  | 1-tri(ethylene glycol)-1'-methyl-m-xylyl-4,4'-bipyridinium <sup>27</sup>         | 25     | 5.06                            | $6.0 \cdot 10^6$                           | $5.3 \cdot 10^1$            | -28.9                             | 34.3                                      | 63.2                                       |
| CB7  | 1,1'-(1,4-phenylenebis(methylene))bis(pyridin-1-ium-4-carboxylate) <sup>28</sup> | 25     | 5.81                            | $6.2 \cdot 10^{-1}$                        | $9.6 \cdot 10^{-7}$         | -33.2                             | 74.2                                      | 107.4                                      |
| CB7  | 1,1'-(1,4-phenylenebis(methylene))bis(pyridin-1-ium-3-carboxylate) <sup>28</sup> | 25     | 5.75                            | 3.4                                        | $6.0 \cdot 10^{-6}$         | -32.8                             | 70.0                                      | 102.8                                      |
| CB7  | N-phenyl-2-naphthyl ammonium cation <sup>29</sup>                                | 20     | 5.48                            | $1.2 \cdot 10^7$                           | $3.87 \cdot 10^1$           | -30.7                             | 32.1                                      | 62.8                                       |
| CB7  | 1,1'-bis(5-carboxypentyl)-[4,4'-bipyridine]-1,1'-dium <sup>30</sup>              | 20     | 5.57                            | $7.5 \cdot 10^3$                           | $2.0 \cdot 10^{-2}$         | -31.3                             | 50.0                                      | 81.3                                       |

## Electronic Supplementary Information

|                  |                                   |    |             |                  |                       |              |      |       |
|------------------|-----------------------------------|----|-------------|------------------|-----------------------|--------------|------|-------|
| CB7(desalted)    | BE                                | 25 | 7.03        | $2.5 \cdot 10^6$ | $2.3 \cdot 10^{-1}$   | -40.1        | 36.5 | 76.7  |
| CB7(desalted)    | AdOH                              | 25 | 10.41       | $1.7 \cdot 10^5$ | $6.6 \cdot 10^{-6}$   | -59.4        | 43.2 | 102.6 |
| CB8              | testosterone                      | 25 | 8.04        | $6.4 \cdot 10^5$ | $5.8 \cdot 10^{-3}$   | -45.9        | 39.9 | 85.8  |
| CB8              | nandrolone                        | 25 | 8.19        | $1.1 \cdot 10^7$ | $7.1 \cdot 10^{-2}$   | -46.8        | 32.8 | 79.6  |
| CB8              | prednisolone                      | 25 | 6.15        | $1.6 \cdot 10^6$ | 1.1                   | -35.1        | 37.7 | 72.8  |
| CB8              | MPCP                              | 25 | 12.59       | $1.2 \cdot 10^7$ | $3 \cdot 10^{-6}$     | -71.9        | 32.6 | 104.5 |
| CB8              | BE <sup>31</sup>                  | 10 | 7.23        | $6.4 \cdot 10^7$ | 3.8                   | -39.2        | 26.9 | 66.1  |
| CB8(desalted)    | MPCP                              | 25 | 12.59       | $2.0 \cdot 10^7$ | $5.1 \cdot 10^{-6}$   | -71.9        | 31.3 | 103.2 |
| CB8(desalted)    | FeCp <sub>2</sub> OH              | 25 | 6.56        | $2.1 \cdot 10^7$ | 5.8                   | -37.5        | 31.3 | 68.7  |
| CB8(desalted)    | AdOH                              | 25 | 6.79        | $1.2 \cdot 10^7$ | 1.97                  | -38.8        | 32.6 | 71.3  |
| CB8 $\supset$ BE | BE <sup>31</sup>                  | 10 | 6.92        | $5.0 \cdot 10^6$ | $6.0 \cdot 10^{-1}$   | -37.5        | 32.9 | 70.4  |
| CB8 $\supset$ MV | 1-Naphthylamine-PEG <sup>32</sup> | 5  | 4.60        | $2.5 \cdot 10^7$ | $3.9 \cdot 10^2$      | -24.5        | 28.6 | 54.2  |
| CB8 $\supset$ MV | 2-Naphthylamine-PEG <sup>32</sup> | 5  | $\geq 5.30$ | $4.0 \cdot 10^7$ | $\leq 2.0 \cdot 10^2$ | $\leq -28.2$ | 27.5 | 55.7  |
| CB8 $\supset$ MV | Anthracene-PEG <sup>32</sup>      | 5  | $\geq 6.45$ | $2.8 \cdot 10^7$ | $\leq 1.0 \cdot 10^1$ | $\leq -34.3$ | 28.3 | 62.6  |
| CB8 $\supset$ MV | Fluorene-PEG <sup>32</sup>        | 5  | $\geq 6.45$ | $2.8 \cdot 10^7$ | $\leq 1.0 \cdot 10^1$ | $\leq -34.3$ | 28.3 | 62.6  |
| CB8 $\supset$ MV | Dibenzofuran-PEG <sup>32</sup>    | 5  | 5.83        | $2.2 \cdot 10^7$ | $3.2 \cdot 10^1$      | -31.1        | 28.9 | 59.9  |
| CB8 $\supset$ MV | Pyrene-PEG <sup>32</sup>          | 5  | 6.36        | $1.9 \cdot 10^7$ | 8.0                   | -33.9        | 29.2 | 63.2  |
| HSA              | PBZ                               | 25 | 5.83        | $6.6 \cdot 10^5$ | $9.7 \cdot 10^{-1}$   | -33.3        | 39.8 | 73.1  |
| HSA              | warfarin                          | 25 | 5.15        | $6.7 \cdot 10^5$ | 4.8                   | -29.4        | 39.8 | 69.1  |
| HSA              | tolbutamide <sup>33</sup>         | 37 | 5.04        | $6.5 \cdot 10^4$ | $5.9 \cdot 10^{-1}$   | -29.9        | 47.5 | 77.4  |
| HSA              | acetohexamide <sup>33</sup>       | 37 | 5.26        | $1.2 \cdot 10^5$ | $6.7 \cdot 10^{-1}$   | -31.2        | 45.9 | 77.1  |
| HSA              | verapamil <sup>33</sup>           | 37 | 4.18        | $5.3 \cdot 10^3$ | $3.5 \cdot 10^{-1}$   | -24.8        | 54.0 | 78.8  |
| HSA              | gliclazide <sup>33</sup>          | 37 | 4.90        | $4.9 \cdot 10^4$ | $6.1 \cdot 10^{-1}$   | -29.1        | 48.2 | 77.3  |
| HSA              | chlorpromazine <sup>33</sup>      | 37 | 4.79        | $2.5 \cdot 10^5$ | 3.96                  | -28.5        | 44.1 | 72.5  |

<sup>[a]</sup> measured in water by fluorescence based *kinGDA* <sup>[b]</sup> measured in D<sub>2</sub>O : formic acid (1:1) mixture by NMR





## Electronic Supplementary Information

**Table S5:** Calculation of the concentration of CB7 (top) and estradiol (bottom) via the received integrals from Fig. S5.

| species   | integral | protons | norm. integral | divisor | conc. [mM] |
|-----------|----------|---------|----------------|---------|------------|
| DMS       | 6.00     | 6.0     | 1.00000        |         | 1.00000    |
| CB7-1     | 14.31    | 14.0    | 1.02214        | 0.97834 | 1.02214    |
| CB7-2     | 14.44    | 14.0    | 1.03143        | 0.96953 | 1.03143    |
| CB7-3     | 14.29    | 14.0    | 1.02071        | 0.97971 | 1.02071    |
| CB7-Mean  |          |         |                |         | 1.02476    |
| CB7-StDev |          |         |                |         | 0.00582    |

| species         | integral | protons | norm. integral | divisor | conc. [mM] |
|-----------------|----------|---------|----------------|---------|------------|
| DMS             | 6.00     | 6.00    | 1.00000        |         | 1.00000    |
| estradiol       | 0.74     | 1.00    | 0.74000        | 1.35135 | 0.74000    |
| estradiol       | 0.75     | 1.00    | 0.75000        | 1.35135 | 0.74000    |
| estradiol       | 0.76     | 1.00    | 0.76000        | 1.31579 | 0.76000    |
| estradiol-Mean  |          |         |                |         | 0.74667    |
| estradiol-StDev |          |         |                |         | 0.00943    |

## 7 References

- B. Bendeby, L. Kenne and C. Sandström, *J. Incl. Phenom. Macrocycl. Chem.*, 2004, **50**, 173-181.
- <https://www.drugbank.ca/drugs/DB00812>, PBZ, <https://www.drugbank.ca/drugs/DB00812>, (accessed 2019.12.02).
- A. I. Lazar, F. Biedermann, K. R. Mustafina, K. I. Assaf, A. Hennig and W. M. Nau, *J. Am. Chem. Soc.*, 2016, **138**, 13022-13029.
- M. J. Pilling, *Low-temperature combustion and autoignition*, Elsevier, 1997.
- C. Wang, S. R. Perumalla, R. Lu, J. Fang and C. C. Sun, *Cryst. Growth Des.*, 2016, **16**, 933-939.
- T. Janoschka, N. Martin, M. D. Hager and U. S. Schubert, *Angew. Chem. Int. Ed.*, 2016, **55**, 14427-14430.
- <https://www.smellspedia.com/raw-material/d-fenchone/>.
- A. S. Saratikov, L. A. Pchelkina, N. A. Belikova, A. A. Bobyleva, N. F. Dubitskaya, M. D. Ordubadi, S. K. Ermolaeva and A. F. Plate, *Pharm. Chem. J.*, 1977, **11**, 643-645.
- S. R. J. Hoare, *J. Pharmacol. Toxicol. Methods*, 2018, **89**, 26-38.
- H. J. Motulsky and L. C. Mahan, *Mol. Pharmacol.*, 1984, **25**, 1.
- C. A. Schalley, *Analytical Methods in Supramolecular Chemistry*, Wiley, Weinheim, 2012.
- Z. Miskolczy and L. Biczok, *J. Phys. Chem. B*, 2014, **118**, 2499-2505.
- S. Sinn, J. Kraemer and F. Biedermann, *in press*, 2020.
- S. Zhang, L. Grimm, Z. Miskolczy, L. Biczok, F. Biedermann and W. M. Nau, *Chem Commun (Camb)*, 2019, **55**, 14131-14134.
- S. Sinn, E. Spuling, S. Bräse and F. Biedermann, *Chem. Sci.*, 2019, **10**, 6584-6593.
- E. Masson, M. Raeisi and K. Kotturi, *Isr. J. Chem.*, 2018, **58**, 413-434.
- C. Marquez and W. M. Nau, *Angew. Chem. Int. Ed.*, 2001, **40**, 3155-3160.
- C. Marquez, R. R. Hudgins and W. M. Nau, *J. Am. Chem. Soc.*, 2004, **126**, 5806-5816.
- P. Mukhopadhyay, P. Y. Zavalij and L. Isaacs, *J. Am. Chem. Soc.*, 2006, **128**, 14093-14102.
- Z. Miskolczy, L. Biczok and I. Jablonkai, *Phys. Chem. Chem. Phys.*, 2016, **19**, 766-773.
- M. H. Tootoonchi, S. Yi and A. E. Kaifer, *J. Am. Chem. Soc.*, 2013, **135**, 10804-10809.
- H. Tang, D. Fuentealba, Y. H. Ko, N. Selvapalam, K. Kim and C. Bohne, *J. Am. Chem. Soc.*, 2011, **133**, 20623-20633.
- Z. Miskolczy, J. G. Harangozo, L. Biczok, V. Wintgens, C. Lorthioir and C. Amiel, *Photochem Photobiol Sci*, 2014, **13**, 499-508.
- S. Senler, B. Cheng and A. E. Kaifer, *Org. Lett.*, 2014, **16**, 5834-5837.
- B. Held, H. Tang, P. Natarajan, C. P. da Silva, V. de Oliveira Silva, C. Bohne and F. H. Quina, *Photochem Photobiol Sci*, 2016, **15**, 752-757.
- S. S. Thomas and C. Bohne, *Faraday Discuss.*, 2015, **185**, 381-398.
- J. Kalmar, S. B. Ellis, M. T. Ashby and R. L. Halterman, *Org. Lett.*, 2012, **14**, 3248-3251.
- I. Neira, M. D. Garcia, C. Peinador and A. E. Kaifer, *J. Org. Chem.*, 2019, **84**, 2325-2329.
- S. S. Thomas, H. Tang and C. Bohne, *J. Am. Chem. Soc.*, 2019, **141**, 9645-9654.
- A. E. Kaifer, W. Li, S. Silvi and V. Sindelar, *Chem Commun (Camb)*, 2012, **48**, 6693-6695.
- Z. Miskolczy and L. Biczok, *Phys. Chem. Chem. Phys.*, 2014, **16**, 20147-20156.
- E. A. Appel, F. Biedermann, D. Hoogland, J. Del Barrio, M. D. Driscoll, S. Hay, D. J. Wales and O. A. Scherman, *J. Am. Chem. Soc.*, 2017, **139**, 12985-12993.
- X. Zheng, Z. Li, M. I. Podariu and D. S. Hage, *Anal. Chem.*, 2014, **86**, 6454-6460.
